# Supplementary material
Source: HighWire-hosted journal article supplement (doi:10.1101/rna.078700.121)
Supplement: Supplemental_enriched_genes_EB1-GFPvsGFP.xlsx [file Supplemental_enriched_genes_EB1-GFPvsGFP.xlsx]

## Sheet: Sheet1
	Gene	BaseMean	log2FoldChange	Stderr	Wald-Stats	pvalue	padj	symbol	gene_name
1	FBgn0086451	5050.53	3.77928	0.204484	18.4821	2.88023e-76	2.86036e-72	l(2)k09022	lethal (2) k09022
2	FBgn0004649	42953.8	3.39782	0.190506	17.8358	3.72993e-71	1.8521e-67	yl	yolkless
3	FBgn0261797	9859.62	4.10697	0.247063	16.6232	4.73472e-62	1.56735e-58	Dhc64C	Dynein heavy chain 64C
4	FBgn0250789	3462.55	3.70811	0.225975	16.4094	1.63843e-60	4.06781e-57	alpha-Spec	alpha Spectrin
5	FBgn0031107	2790.96	4.09309	0.257609	15.8888	7.57981e-57	1.5055e-53	HERC2	HECT and RLD domain containing protein 2
6	FBgn0036663	2985.9	3.22548	0.208002	15.507	3.11072e-54	5.14876e-51	CG9674	CG9674
7	FBgn0010051	1214.73	3.4062	0.225501	15.105	1.50043e-51	2.12868e-48	Itp-r83A	Inositol 1,4,5,-tris-phosphate receptor
8	FBgn0267350	13514.7	3.33345	0.228564	14.5843	3.53403e-48	4.38705e-45	PI4KIIIalpha	Phosphatidylinositol 4-kinase III alpha
9	FBgn0027948	7091.73	3.02078	0.211965	14.2513	4.39795e-46	4.85289e-43	msps	mini spindles
10	FBgn0264326	2524.21	2.66964	0.189234	14.1076	3.40931e-45	3.38579e-42	DNApol-epsilon255	DNA polymerase epsilon 255kD subunit
11	FBgn0004367	1290.23	3.13038	0.223915	13.9802	2.0582e-44	1.85818e-41	mei-41	meiotic 41
12	FBgn0267390	4687.7	3.46066	0.253344	13.6599	1.76194e-42	1.45815e-39	dop	drop out
13	FBgn0033688	20989.4	3.49785	0.259019	13.5042	1.47618e-41	1.1188e-38	Prp8	pre-mRNA processing factor 8
14	FBgn0004391	3802.6	3.64143	0.269748	13.4994	1.5772e-41	1.1188e-38	shtd	shattered
15	FBgn0029763	7822.03	2.57148	0.192513	13.3575	1.07137e-40	6.64985e-38	Usp16-45	Ubiquitin specific protease 16/45
16	FBgn0023458	7957.84	3.62694	0.277076	13.09	3.75371e-39	2.19283e-36	Rbcn-3A	Rabconnectin-3A
17	FBgn0039016	2451.78	3.44534	0.265233	12.9899	1.39665e-38	7.64228e-36	Dcr-1	Dicer-1
18	FBgn0263968	1607.68	3.28461	0.252928	12.9864	1.46212e-38	7.64228e-36	nonC	no-on-and-no-off transient C
19	FBgn0004650	14424.4	3.37365	0.26114	12.9189	3.52027e-38	1.74799e-35	fs(1)N	female sterile (1) Nasrat
20	FBgn0021796	5036.27	3.34911	0.263467	12.7117	5.09472e-37	2.40932e-34	Tor	Target of rapamycin
21	FBgn0031985	1552.54	3.26758	0.259145	12.6091	1.88231e-36	8.49693e-34	mon2	monensin sensitivity 2
22	FBgn0040236	3222.84	2.74714	0.21973	12.5024	7.24478e-36	3.12817e-33	c11.1	c11.1
23	FBgn0283531	3999.1	2.90437	0.232453	12.4944	8.00513e-36	3.31245e-33	Duox	Dual oxidase
24	FBgn0025864	3793.58	2.80489	0.225188	12.4558	1.3003e-35	5.16531e-33	Crag	Calmodulin-binding protein related to a Rab3 GDP/GTP exchange protein
25	FBgn0266717	8598.47	3.55723	0.28615	12.4314	1.76605e-35	6.74564e-33	Bruce	BIR repeat containing ubiquitin-conjugating enzyme
26	FBgn0027508	1888.53	2.91643	0.234981	12.4113	2.2685e-35	8.34388e-33	Tnks	tankyrase
27	FBgn0262719	453.04	8.54159	0.689455	12.3889	3.00127e-35	1.06448e-32	CG43163	uncharacterized protein
28	FBgn0003210	1894.63	2.79215	0.225981	12.3557	4.53866e-35	1.55426e-32	rb	ruby
29	FBgn0030266	2616.18	3.74142	0.303228	12.3386	5.61079e-35	1.85736e-32	CG11122	uncharacterized protein
30	FBgn0033155	6378.6	2.55324	0.208112	12.2686	1.33537e-34	4.27794e-32	Br140	Bromodomain-containing protein, 140kD
31	FBgn0016081	2311.13	3.3242	0.271469	12.2452	1.78162e-34	5.52913e-32	fry	furry
32	FBgn0015477	5464.18	3.45739	0.282411	12.2424	1.8452e-34	5.55292e-32	Rme-8	Receptor mediated endocytosis 8
33	FBgn0026722	1629.81	2.62659	0.215168	12.2071	2.84761e-34	8.31753e-32	drosha	drosha
34	FBgn0035145	4696.97	2.9889	0.246605	12.1202	8.25304e-34	2.34174e-31	MED14	Mediator complex subunit 14
35	FBgn0085430	2750.25	3.27791	0.271087	12.0917	1.16788e-33	3.22172e-31	CG34401	uncharacterized protein
36	FBgn0010575	4693.19	2.68306	0.22224	12.0728	1.47034e-33	3.94647e-31	sbb	scribbler
37	FBgn0035237	3512.67	3.29003	0.273308	12.0378	2.24908e-33	5.87778e-31	CG13917	uncharacterized protein
38	FBgn0263599	3419.54	3.34404	0.277901	12.0332	2.37663e-33	6.05188e-31	l(3)72Ab	lethal (3) 72Ab
39	FBgn0035812	2639.8	2.33451	0.195052	11.9686	5.18748e-33	1.28792e-30	CG7457	CG7457
40	FBgn0260012	2132.04	2.29836	0.192956	11.9113	1.03326e-32	2.50275e-30	pds5	precocious dissociation of sisters 5
41	FBgn0011230	6419.49	3.74099	0.314215	11.9058	1.10399e-32	2.61042e-30	poe	purity of essence
42	FBgn0005632	3864.78	3.00194	0.252443	11.8915	1.30962e-32	2.98163e-30	faf	fat facets
43	FBgn0003189	6186.74	3.68324	0.309755	11.8908	1.32103e-32	2.98163e-30	r	rudimentary
44	FBgn0041171	14397.1	3.09574	0.260918	11.8648	1.80331e-32	3.9797e-30	ago	archipelago
45	FBgn0005198	2503.65	2.9957	0.252852	11.8476	2.21344e-32	4.77863e-30	gig	gigas
46	FBgn0034400	3362.99	3.42888	0.28973	11.8347	2.58148e-32	5.45461e-30	CG15099	uncharacterized protein
47	FBgn0004598	11049.1	2.85374	0.241549	11.8143	3.29122e-32	6.8094e-30	Fur2	Furin 2
48	FBgn0021764	5570.12	2.9234	0.247612	11.8064	3.61767e-32	7.33207e-30	sdk	sidekick
49	FBgn0032479	2205.19	2.16323	0.184391	11.7318	8.76225e-32	1.74036e-29	CG16974	uncharacterized protein
50	FBgn0040752	1460.09	3.2658	0.28002	11.6627	1.97644e-31	3.84863e-29	Prosap	prosap
51	FBgn0004875	4503.96	2.91632	0.250121	11.6596	2.04977e-31	3.91466e-29	enc	encore
52	FBgn0083962	1764.94	3.08386	0.266102	11.589	4.6834e-31	8.77563e-29	CG34126	uncharacterized protein
53	FBgn0034989	4542.01	2.45496	0.213011	11.525	9.86673e-31	1.81457e-28	CG3356	CG3356
54	FBgn0085443	1882.13	2.392	0.207856	11.5079	1.20352e-30	2.17312e-28	spri	sprint
55	FBgn0040271	544.429	3.448	0.301616	11.4318	2.90191e-30	5.14623e-28	Sulf1	Sulfated
56	FBgn0030701	2952.23	2.28505	0.200017	11.4243	3.16206e-30	5.5092e-28	CG16952	uncharacterized protein
57	FBgn0027660	4733	2.41371	0.211434	11.4159	3.48419e-30	5.96577e-28	blot	bloated tubules
58	FBgn0262519	15489.7	2.60495	0.22959	11.3461	7.75497e-30	1.30533e-27	Mi-2	Mi-2
59	FBgn0034691	1400.31	2.63371	0.23282	11.3122	1.14161e-29	1.88955e-27	Synj	Synaptojanin
60	FBgn0035704	1738.25	2.54125	0.224789	11.305	1.23895e-29	2.01705e-27	Vps8	Vacuolar protein sorting 8
61	FBgn0050377	3310.12	2.36665	0.210108	11.264	1.97668e-29	3.16022e-27	CG30377	uncharacterized protein
62	FBgn0262730	669.507	3.20717	0.28476	11.2627	2.00477e-29	3.16022e-27	dtn	detonator
63	FBgn0043900	1831.42	3.43346	0.305163	11.2512	2.28341e-29	3.54322e-27	pygo	pygopus
64	FBgn0260970	7634.87	2.94866	0.262317	11.2408	2.56905e-29	3.92512e-27	Ubr3	Ubr3 ubiquitin ligase
65	FBgn0035229	3214.55	2.68359	0.23907	11.2251	3.06943e-29	4.61855e-27	pns	pinstripe
66	FBgn0005674	6854.72	3.18307	0.283672	11.2209	3.21829e-29	4.70012e-27	GluProRS	Glutamyl-prolyl-tRNA synthetase
67	FBgn0260990	5388.99	2.39672	0.213575	11.2219	3.18259e-29	4.70012e-27	yata	yata
68	FBgn0260442	4196.4	3.08959	0.276315	11.1814	5.02823e-29	7.237e-27	rhea	rhea
69	FBgn0038968	3731.36	2.81607	0.2526	11.1483	7.29512e-29	1.03497e-26	CG12499	uncharacterized protein
70	FBgn0036574	4990.07	2.5108	0.225368	11.1409	7.93375e-29	1.10972e-26	elg1	enhanced level of genomic instability 1
71	FBgn0033889	3999.11	2.34703	0.210811	11.1333	8.63669e-29	1.19126e-26	CG6701	CG6701
72	FBgn0030504	6410.38	2.8073	0.252293	11.1271	9.25502e-29	1.25906e-26	CG2691	CG2691
73	FBgn0032821	1540.7	2.86459	0.258123	11.0978	1.28611e-28	1.72599e-26	CdGAPr	Cd GTPase activating protein-related
74	FBgn0039528	1814.4	3.53142	0.320885	11.0052	3.60518e-28	4.77374e-26	dsd	distracted
75	FBgn0015589	1198.15	3.17226	0.288389	10.9999	3.82485e-28	4.99798e-26	Apc	APC-like
76	FBgn0022787	1911.13	2.9899	0.272304	10.98	4.76837e-28	6.14996e-26	Hel89B	Helicase 89B
77	FBgn0025641	5853.82	2.94715	0.269408	10.9394	7.47304e-28	9.51471e-26	DAAM	Dishevelled Associated Activator of Morphogenesis
78	FBgn0043884	8685.74	3.11153	0.284685	10.9297	8.30978e-28	1.04461e-25	mask	multiple ankyrin repeats single KH domain
79	FBgn0259734	3190.07	2.43876	0.223538	10.9098	1.03445e-27	1.28414e-25	Nost	Nostrin
80	FBgn0028974	3063.19	2.85742	0.262506	10.8851	1.35707e-27	1.66384e-25	xmas-2	xmas-2
81	FBgn0263593	1382.33	2.99958	0.276562	10.846	2.08443e-27	2.52444e-25	Lpin	Lipin
82	FBgn0261885	6525.24	3.20231	0.296419	10.8033	3.31909e-27	3.97131e-25	osa	osa
83	FBgn0263289	4066.69	2.77035	0.25723	10.77	4.7722e-27	5.64199e-25	scrib	scribbled
84	FBgn0033698	2021.61	2.9985	0.278473	10.7676	4.89352e-27	5.71735e-25	CG8858	CG8858
85	FBgn0261859	802.017	3.12362	0.292224	10.6891	1.14423e-26	1.32132e-24	CG42788	uncharacterized protein
86	FBgn0082831	2630.13	2.65988	0.249038	10.6806	1.25469e-26	1.43223e-24	pps	protein partner of snf
87	FBgn0033766	4836.81	3.42013	0.320666	10.6657	1.47252e-26	1.66177e-24	CG8771	CG8771
88	FBgn0003277	10552.4	2.89103	0.271191	10.6605	1.55814e-26	1.73864e-24	RpII215	RNA polymerase II 215kD subunit
89	FBgn0039302	9653.06	2.98374	0.279992	10.6565	1.62546e-26	1.7936e-24	Nup358	Nucleoporin 358kD
90	FBgn0000140	3884.95	2.99745	0.281561	10.6458	1.82418e-26	1.99076e-24	asp	abnormal spindle
91	FBgn0004167	1463.19	3.77191	0.355342	10.6149	2.54169e-26	2.74365e-24	kst	karst
92	FBgn0039120	8345.48	2.7688	0.261168	10.6016	2.92847e-26	3.12717e-24	Nup98-96	Nucleoporin 98-96kD
93	FBgn0052654	3243.52	2.64327	0.249391	10.5989	3.01521e-26	3.18553e-24	Sec16	Secretory 16
94	FBgn0010355	2756.39	2.51742	0.238371	10.561	4.52017e-26	4.72525e-24	Taf1	TBP-associated factor 1
95	FBgn0035267	1760.91	2.96414	0.281242	10.5395	5.68169e-26	5.87759e-24	CG13921	uncharacterized protein
96	FBgn0030687	2454.99	2.66047	0.252481	10.5373	5.81513e-26	5.95362e-24	CG17209	uncharacterized protein
97	FBgn0011740	2234.96	2.43599	0.232213	10.4903	9.56896e-26	9.69687e-24	alpha-Man-IIa	alpha-Mannosidase class II a
98	FBgn0003464	5754.44	2.54786	0.242958	10.4868	9.93241e-26	9.96351e-24	sol	small optic lobes
99	FBgn0051729	2443.82	2.51895	0.240345	10.4806	1.06094e-25	1.05362e-23	CG31729	uncharacterized protein
100	FBgn0034590	959.37	2.66493	0.25432	10.4787	1.08278e-25	1.06466e-23	Magi	magi
101	FBgn0039668	1410.19	2.59461	0.247942	10.4646	1.25655e-25	1.22341e-23	Trc8	TRC8 ring finger protein
102	FBgn0037897	2059.98	3.26181	0.312209	10.4475	1.50408e-25	1.45019e-23	CG5270	CG5270
103	FBgn0002921	12771.5	2.55755	0.245903	10.4006	2.46277e-25	2.35171e-23	Atpalpha	Na pump alpha subunit
104	FBgn0261710	2225.68	2.95072	0.28396	10.3913	2.71569e-25	2.56853e-23	nocte	no circadian temperature entrainment
105	FBgn0067864	2993.4	2.14283	0.206919	10.3559	3.93533e-25	3.68696e-23	Patj	patj
106	FBgn0041150	5217.03	2.35105	0.227484	10.335	4.89443e-25	4.54267e-23	hoe1	hoepel1
107	FBgn0266696	5138.09	2.95722	0.286389	10.3259	5.38221e-25	4.94914e-23	CG45186	uncharacterized protein
108	FBgn0035333	2328.42	2.59264	0.25205	10.2862	8.13334e-25	7.4103e-23	CG1317	CG1317
109	FBgn0261554	2639.25	2.96126	0.288362	10.2692	9.6972e-25	8.75481e-23	CG42672	uncharacterized protein
110	FBgn0041582	1535.75	2.47144	0.241746	10.2233	1.55921e-24	1.395e-22	tamo	tamo
111	FBgn0031006	3344.28	3.32514	0.325333	10.2207	1.60153e-24	1.42007e-22	rictor	rapamycin-insensitive companion of Tor
112	FBgn0026239	1282	2.60026	0.25462	10.2123	1.74617e-24	1.53462e-22	gukh	GUK-holder
113	FBgn0029899	4559.62	3.13549	0.308105	10.1767	2.52015e-24	2.17631e-22	CG14438	uncharacterized protein
114	FBgn0039214	3906.32	3.1774	0.312817	10.1574	3.07252e-24	2.63045e-22	puf	puffyeye
115	FBgn0260936	5202.96	2.22748	0.219479	10.149	3.34938e-24	2.84296e-22	scny	scrawny
116	FBgn0053158	1524.35	2.39603	0.236468	10.1326	3.95956e-24	3.33241e-22	CG33158	uncharacterized protein
117	FBgn0259113	2036.82	2.1424	0.211554	10.127	4.19441e-24	3.5004e-22	DNApol-alpha180	DNA polymerase alpha 180kD
118	FBgn0022153	7564.6	2.64627	0.261561	10.1172	4.63269e-24	3.80225e-22	l(2)k05819	lethal (2) k05819
119	FBgn0029789	1504.37	2.56536	0.254547	10.0781	6.90186e-24	5.57255e-22	CG3160	CG3160
120	FBgn0016070	22569.4	2.44035	0.242691	10.0554	8.69956e-24	6.91163e-22	smg	smaug
121	FBgn0261985	4097.07	2.29817	0.228971	10.037	1.04864e-23	8.26513e-22	Ptpmeg	Protein tyrosine phosphatase Meg
122	FBgn0039207	8118.84	2.84572	0.284483	10.0031	1.47701e-23	1.15498e-21	CG5789	CG5789
123	FBgn0267488	4627.99	2.66209	0.266187	10.0008	1.51143e-23	1.17266e-21	Mcr	Macroglobulin complement-related
124	FBgn0051368	1377.55	2.73963	0.274191	9.9917	1.6572e-23	1.27579e-21	CG31368	uncharacterized protein
125	FBgn0266084	939.277	2.53225	0.253548	9.98727	1.73294e-23	1.32384e-21	Fhos	Formin homology 2 domain containing
126	FBgn0036053	2336.88	2.1314	0.213459	9.98509	1.77144e-23	1.34291e-21	iPLA2-VIA	calcium-independent phospholipase A2 VIA
127	FBgn0034859	1194.85	2.84464	0.285459	9.96514	2.16569e-23	1.62935e-21	CG3520	CG3520
128	FBgn0263197	1261	2.0463	0.205657	9.95008	2.51975e-23	1.88147e-21	Patronin	patronin
129	FBgn0263077	1570.58	2.48138	0.249831	9.93224	3.01407e-23	2.21724e-21	CG43340	uncharacterized protein
130	FBgn0266019	1477.1	2.93123	0.29621	9.89579	4.3416e-23	3.14718e-21	rudhira	rudhira
131	FBgn0267408	1369.38	3.18458	0.322026	9.88921	4.63687e-23	3.31286e-21	AOX1	Aldehyde oxidase 1
132	FBgn0002552	3641.02	2.3611	0.238936	9.88172	4.99678e-23	3.5445e-21	lin	lines
133	FBgn0010905	3305.39	2.45054	0.248378	9.86617	5.835e-23	4.10975e-21	Spn	Spinophilin
134	FBgn0032689	1891.46	2.5954	0.263269	9.85837	6.30648e-23	4.41054e-21	CG10413	uncharacterized protein
135	FBgn0263006	14456.2	2.30355	0.234315	9.83103	8.27657e-23	5.74788e-21	SERCA	Sarco/endoplasmic reticulum Ca(2+)-ATPase
136	FBgn0265194	898.679	3.21318	0.326922	9.82857	8.48121e-23	5.84909e-21	Trpm	Transient receptor potential cation channel, subfamily M
137	FBgn0035162	2365.45	2.28601	0.233168	9.80411	1.08091e-22	7.40313e-21	CG13900	uncharacterized protein
138	FBgn0035227	877.034	2.89498	0.295364	9.80139	1.11048e-22	7.55355e-21	Iml1	Increased minichromosome loss 1
139	FBgn0001316	3493.54	2.52784	0.258709	9.77098	1.49989e-22	1.01329e-20	klar	klarsicht
140	FBgn0003996	11030	2.75323	0.281866	9.76789	1.54639e-22	1.03765e-20	w	white
141	FBgn0036451	2800.84	3.26933	0.335281	9.75102	1.82619e-22	1.21211e-20	CG9425	CG9425
142	FBgn0087008	9915.09	2.97452	0.30602	9.72001	2.47757e-22	1.62945e-20	e(y)3	enhancer of yellow 3
143	FBgn0024329	3477.51	2.46696	0.25439	9.69759	3.08717e-22	2.01702e-20	Mekk1	Mekk1
144	FBgn0087013	20852.9	2.26858	0.23425	9.68443	3.51153e-22	2.26448e-20	Karybeta3	Karyopherin beta 3
145	FBgn0027512	14098.3	2.7144	0.280615	9.67303	3.92584e-22	2.51532e-20	CG10254	uncharacterized protein
146	FBgn0261016	5816.78	2.80634	0.290312	9.66663	4.17903e-22	2.66038e-20	clos	closca
147	FBgn0086347	985.486	2.45259	0.253988	9.65634	4.6206e-22	2.90425e-20	Myo31DF	Myosin 31DF
148	FBgn0263110	1903.44	3.44487	0.356793	9.65509	4.67756e-22	2.92156e-20	CG43367	uncharacterized protein
149	FBgn0030735	1638.32	2.25542	0.233862	9.64426	5.19836e-22	3.20652e-20	CG3632	CG3632
150	FBgn0026598	3546.61	2.04883	0.212711	9.632	5.8578e-22	3.59097e-20	Apc2	Adenomatous polyposis coli 2
151	FBgn0010909	1956.04	2.47581	0.2578	9.60359	7.72041e-22	4.67508e-20	msn	misshapen
152	FBgn0035173	5461.09	2.1443	0.223423	9.59747	8.19306e-22	4.90153e-20	CG13907	uncharacterized protein
153	FBgn0020306	18147.8	3.18474	0.332051	9.59111	8.71406e-22	5.18199e-20	dom	domino
154	FBgn0001169	2851.82	2.43767	0.254656	9.57237	1.04482e-21	6.17624e-20	H	Hairless
155	FBgn0004876	1593.16	2.69728	0.282212	9.55764	1.20477e-21	7.07962e-20	cdi	center divider
156	FBgn0029824	781.908	2.48131	0.259751	9.55264	1.26427e-21	7.38557e-20	CG3726	CG3726
157	FBgn0022764	4219.68	3.01935	0.316322	9.54518	1.3587e-21	7.89078e-20	Sin3A	Sin3A
158	FBgn0034049	2024.25	2.7507	0.288336	9.5399	1.42964e-21	8.2068e-20	bdg	bedraggled
159	FBgn0025633	5001.94	2.21817	0.23294	9.5225	1.69056e-21	9.64883e-20	CG13366	uncharacterized protein
160	FBgn0284253	4599.26	2.41026	0.254004	9.48905	2.33148e-21	1.32308e-19	LeuRS	Leucyl-tRNA synthetase
161	FBgn0037109	7896.79	2.15119	0.226724	9.48814	2.35184e-21	1.32705e-19	MED1	Mediator complex subunit 1
162	FBgn0259685	1606.74	2.96989	0.313394	9.47653	2.62877e-21	1.46665e-19	crb	crumbs
163	FBgn0031266	2693.7	2.1206	0.224217	9.45783	3.14392e-21	1.74426e-19	CG2807	CG2807
164	FBgn0034734	3350.06	3.13406	0.331427	9.45626	3.19169e-21	1.76092e-19	CG4554	CG4554
165	FBgn0261283	4656.22	2.03392	0.215222	9.45031	3.37835e-21	1.85361e-19	SREBP	Sterol regulatory element binding protein
166	FBgn0038108	3690.59	3.05989	0.323939	9.4459	3.52365e-21	1.92271e-19	CG7518	CG7518
167	FBgn0085436	4217.23	3.23517	0.342612	9.44269	3.63342e-21	1.97178e-19	Not1	Not1
168	FBgn0014141	2348.54	2.97005	0.314561	9.44187	3.66194e-21	1.97645e-19	cher	cheerio
169	FBgn0028539	1151.08	2.50805	0.265975	9.42965	4.11473e-21	2.20883e-19	CG31731	uncharacterized protein
170	FBgn0266580	4346.6	2.62662	0.278598	9.42799	4.18041e-21	2.23203e-19	Gp210	Glycoprotein 210 kDa
171	FBgn0014133	9421.69	2.23568	0.237777	9.4024	5.33326e-21	2.83233e-19	bif	bifocal
172	FBgn0029525	3352.13	2.50619	0.267119	9.3823	6.45482e-21	3.40972e-19	CG18273	uncharacterized protein
173	FBgn0027506	3371.12	2.05963	0.219835	9.36897	7.32407e-21	3.80813e-19	EDTP	Egg-derived tyrosine phosphatase
174	FBgn0001978	4306.83	2.38129	0.254529	9.35565	8.30878e-21	4.29763e-19	stc	shuttle craft
175	FBgn0004647	4364.57	2.89125	0.309069	9.3547	8.38411e-21	4.31412e-19	N	Notch
176	FBgn0031759	2762.51	3.09075	0.330713	9.34572	9.12644e-21	4.67189e-19	lid	little imaginal discs
177	FBgn0261618	2827.66	2.92695	0.313607	9.33317	1.02754e-20	5.2331e-19	larp	La related protein
178	FBgn0033638	5680.83	2.57843	0.276365	9.32981	1.06058e-20	5.37379e-19	CG9005	CG9005
179	FBgn0036980	6923.66	2.12278	0.227581	9.32759	1.08306e-20	5.45981e-19	RhoBTB	Rho-related BTB domain containing
180	FBgn0029685	4688.45	2.44297	0.262198	9.3173	1.19337e-20	5.95546e-19	CG2938	CG2938
181	FBgn0260962	7511.29	2.50311	0.268744	9.31411	1.22977e-20	6.07606e-19	pic	piccolo
182	FBgn0025186	2133.48	2.10782	0.226439	9.30858	1.29553e-20	6.36924e-19	ari-2	ariadne 2
183	FBgn0261938	1727.14	2.27128	0.244121	9.30389	1.35398e-20	6.59137e-19	mtRNApol	mitochondrial RNA polymerase
184	FBgn0052226	1423.37	2.83265	0.3045	9.30264	1.37006e-20	6.63711e-19	Pex23	Peroxin 23
185	FBgn0265778	1719.44	2.59912	0.27993	9.28489	1.61867e-20	7.80343e-19	PDZ-GEF	PDZ domain-containing guanine nucleotide exchange factor
186	FBgn0052676	4407.81	2.84239	0.306764	9.26571	1.93781e-20	9.25211e-19	stx	stuxnet
187	FBgn0262081	2607.86	2.58237	0.279728	9.23169	2.66388e-20	1.25976e-18	Csk	C-terminal Src kinase
188	FBgn0026313	1953.72	2.95783	0.320605	9.22577	2.81543e-20	1.32512e-18	X11L	X11L
189	FBgn0030674	6188.9	3.81836	0.414422	9.21369	3.15094e-20	1.47604e-18	CG8184	CG8184
190	FBgn0039508	6548.35	2.45272	0.266269	9.21144	3.2178e-20	1.49327e-18	CG3368	CG3368
191	FBgn0029870	2863.08	2.30228	0.25028	9.19883	3.61862e-20	1.67146e-18	Marf	Mitochondrial assembly regulatory factor
192	FBgn0003366	117.806	5.86835	0.63821	9.19502	3.74935e-20	1.72383e-18	sev	sevenless
193	FBgn0027505	670.518	2.7848	0.302878	9.19448	3.76796e-20	1.72441e-18	Rab3-GAP	Rab3 GTPase activating protein
194	FBgn0010300	7774.32	2.40386	0.261826	9.18114	4.26555e-20	1.94318e-18	brat	brain tumor
195	FBgn0032395	899.058	4.14176	0.452762	9.14776	5.81275e-20	2.63591e-18	CG6734	CG6734
196	FBgn0034964	3297.17	3.05023	0.334333	9.12335	7.28385e-20	3.2797e-18	IntS1	Integrator 1
197	FBgn0044452	2363.11	3.12905	0.34298	9.12313	7.29849e-20	3.2797e-18	Atg2	Autophagy-related 2
198	FBgn0037760	3009.51	2.45985	0.270134	9.10601	8.54698e-20	3.82343e-18	FBXO11	F-box protein 11
199	FBgn0265523	3483.69	3.62397	0.398031	9.10473	8.64806e-20	3.8513e-18	Smr	Smrter
200	FBgn0043903	3310.3	2.56994	0.282318	9.10299	8.7879e-20	3.8961e-18	dome	domeless
201	FBgn0030833	1661.57	2.10459	0.231241	9.1013	8.9255e-20	3.92209e-18	CG8915	CG8915
202	FBgn0003891	3574.07	3.16123	0.347448	9.09843	9.16492e-20	4.00955e-18	tud	tudor
203	FBgn0029706	1746.88	2.12087	0.233139	9.097	9.28594e-20	4.04468e-18	CG3626	CG3626
204	FBgn0030808	1465.99	2.54168	0.279989	9.07777	1.10825e-19	4.78525e-18	RhoGAP15B	Rho GTPase activating protein at 15B
205	FBgn0001330	2430.61	2.1853	0.240771	9.07626	1.12374e-19	4.8103e-18	kz	kurz
206	FBgn0266572	3370.44	2.02237	0.222831	9.07577	1.12873e-19	4.8109e-18	ebo	ellipsoid body open
207	FBgn0261570	2081.05	2.80108	0.30881	9.07056	1.18407e-19	5.02519e-18	CG42684	uncharacterized protein
208	FBgn0261286	2714.96	2.06196	0.228018	9.04295	1.52497e-19	6.41715e-18	Mat89Ba	Maternal transcript 89Ba
209	FBgn0037541	1341.51	3.14957	0.348749	9.03103	1.70059e-19	7.09601e-18	CG2747	CG2747
210	FBgn0020621	1375.74	2.74815	0.30437	9.02896	1.73304e-19	7.17119e-18	Pkn	Protein kinase N
211	FBgn0030089	2955.81	2.34633	0.259933	9.02669	1.7695e-19	7.29165e-18	AP-1gamma	Adaptor Protein complex 1, gamma subunit
212	FBgn0005386	1925.43	2.96661	0.328718	9.02477	1.80067e-19	7.38943e-18	ash1	absent, small, or homeotic discs 1
213	FBgn0261954	3050.79	3.25633	0.361043	9.01922	1.89426e-19	7.70979e-18	east	enhanced adult sensory threshold
214	FBgn0003218	2710.27	2.30083	0.255671	8.99919	2.27384e-19	9.21693e-18	rdgB	retinal degeneration B
215	FBgn0002431	2919.01	2.95295	0.328341	8.99354	2.3939e-19	9.66416e-18	hyd	hyperplastic discs
216	FBgn0028982	7770.49	2.89595	0.322022	8.99301	2.40548e-19	9.67158e-18	Spt6	Spt6
217	FBgn0032456	4670	3.02349	0.336321	8.98991	2.47438e-19	9.9085e-18	MRP	Multidrug-Resistance like Protein 1
218	FBgn0038320	3206.32	3.22277	0.358821	8.98155	2.66981e-19	1.06055e-17	Sra-1	specifically Rac1-associated protein 1
219	FBgn0012058	1288.76	2.30809	0.257158	8.97535	2.82457e-19	1.11723e-17	Cdc27	Cell division cycle 27
220	FBgn0259212	3488.49	2.67406	0.298437	8.9602	3.24098e-19	1.26717e-17	cno	canoe
221	FBgn0011785	3945.4	2.67572	0.298877	8.95258	3.47264e-19	1.35242e-17	BRWD3	BRWD3
222	FBgn0032026	14547	2.576	0.288123	8.94066	3.86865e-19	1.48913e-17	CG7627	CG7627
223	FBgn0013733	2139.66	3.35099	0.374898	8.93841	3.94793e-19	1.51378e-17	shot	short stop
224	FBgn0263706	1661.88	2.67491	0.300066	8.91439	4.90521e-19	1.8593e-17	CG43658	uncharacterized protein
225	FBgn0260935	1488.45	2.4407	0.274023	8.9069	5.24807e-19	1.98169e-17	Vps15	Vacuolar protein sorting 15
226	FBgn0025621	5663.29	2.2219	0.24948	8.90616	5.2833e-19	1.98744e-17	CG16989	uncharacterized protein
227	FBgn0034733	1291.68	3.2977	0.370681	8.89634	5.77177e-19	2.163e-17	CG4752	CG4752
228	FBgn0000416	7815.24	2.83187	0.318516	8.89083	6.0656e-19	2.26457e-17	Sap-r	Saposin-related
229	FBgn0267351	1834.16	2.21708	0.249419	8.88897	6.16754e-19	2.28544e-17	Topors	Topoisomerase I-interacting protein
230	FBgn0020236	8186.42	2.22398	0.250289	8.88567	6.35391e-19	2.33813e-17	ATPCL	ATP citrate lyase
231	FBgn0052533	1477.03	2.42547	0.272966	8.88561	6.35682e-19	2.33813e-17	CG32533	uncharacterized protein
232	FBgn0031384	2686.49	2.25984	0.254401	8.88301	6.50766e-19	2.38478e-17	CG4238	CG4238
233	FBgn0039227	2982.08	2.14075	0.241059	8.8806	6.65005e-19	2.428e-17	polybromo	polybromo
234	FBgn0266111	2761.77	2.65083	0.298544	8.87921	6.73375e-19	2.44956e-17	ana3	anastral spindle 3
235	FBgn0034786	2031.42	3.27627	0.369375	8.86976	7.33056e-19	2.65693e-17	CG13531	uncharacterized protein
236	FBgn0030366	1459.94	2.53245	0.286025	8.85396	8.44665e-19	3.03926e-17	Usp7	Ubiquitin-specific protease 7
237	FBgn0033224	2033.98	2.1002	0.23739	8.84705	8.98635e-19	3.22179e-17	Nop17l	Nop17 like
238	FBgn0266083	2190.91	2.60567	0.295003	8.83268	1.02193e-18	3.62456e-17	ocm	over compensating males
239	FBgn0003048	827.752	3.34084	0.379258	8.80889	1.26395e-18	4.45118e-17	pcx	pecanex
240	FBgn0001965	1878.77	2.57369	0.292201	8.80795	1.2745e-18	4.47247e-17	Sos	Son of sevenless
241	FBgn0261397	4453.87	2.72707	0.309807	8.80249	1.33815e-18	4.67928e-17	didum	dilute class unconventional myosin
242	FBgn0027580	7615.01	2.5981	0.29542	8.79461	1.43552e-18	5.00216e-17	PCB	Pyruvate carboxylase
243	FBgn0032018	1508.7	2.42162	0.275929	8.77626	1.69008e-18	5.80769e-17	CG7806	CG7806
244	FBgn0019938	3818.28	2.58408	0.294751	8.76698	1.83526e-18	6.26323e-17	RpI1	RNA polymerase I subunit
245	FBgn0039727	1084.32	3.2158	0.367068	8.76076	1.9393e-18	6.59561e-17	Vps13B	Vacuolar protein sorting 13B
246	FBgn0027620	1837.49	2.24745	0.256862	8.74963	2.14053e-18	7.25517e-17	Acf	ATP-dependent chromatin assembly factor large subunit
247	FBgn0261617	6066.26	3.13635	0.358756	8.7423	2.28419e-18	7.71574e-17	nej	nejire
248	FBgn0004656	5857.55	3.03348	0.348239	8.71092	3.0143e-18	1.01475e-16	fs(1)h	female sterile (1) homeotic
249	FBgn0010488	6866.67	2.83617	0.326692	8.6815	3.90597e-18	1.30607e-16	NAT1	NAT1
250	FBgn0015600	3265.37	3.45541	0.398178	8.67805	4.0261e-18	1.34172e-16	toc	toucan
251	FBgn0036365	969.714	2.08258	0.240695	8.65235	5.04517e-18	1.67012e-16	cmb	combover
252	FBgn0039644	10916	2.59583	0.30012	8.64929	5.18194e-18	1.7097e-16	CG11897	uncharacterized protein
253	FBgn0027794	2814.61	2.05756	0.23823	8.63685	5.77825e-18	1.90012e-16	Lrpprc2	Leucine-rich pentatricopeptide repeat containing 2
254	FBgn0039056	3670.53	2.13381	0.247143	8.63393	5.92798e-18	1.94293e-16	CenB1A	Centaurin beta 1A
255	FBgn0250788	1388.29	3.49038	0.404498	8.62892	6.19321e-18	2.02318e-16	beta-Spec	beta Spectrin
256	FBgn0261931	2269.11	2.59788	0.301608	8.61342	7.09157e-18	2.30152e-16	CG42797	uncharacterized protein
257	FBgn0260794	6368.14	2.5016	0.290462	8.61247	7.15007e-18	2.31294e-16	ctrip	circadian trip
258	FBgn0010280	5362.15	2.29613	0.266773	8.60708	7.49457e-18	2.40869e-16	Taf4	TBP-associated factor 4
259	FBgn0262126	2824.95	2.51984	0.292925	8.60234	7.81073e-18	2.50221e-16	Sec24CD	Secretory 24CD
260	FBgn0001324	1390.89	3.18893	0.371349	8.58742	8.89415e-18	2.84012e-16	kto	kohtalo
261	FBgn0000052	6939.23	2.89065	0.336681	8.58571	9.02782e-18	2.87357e-16	ade2	adenosine 2
262	FBgn0264449	1257.29	2.01484	0.235374	8.56018	1.12692e-17	3.56415e-16	CG43867	uncharacterized protein
263	FBgn0039632	2508.01	2.0004	0.233704	8.55956	1.133e-17	3.572e-16	Cul5	Cullin 5
264	FBgn0035690	1026.55	2.43601	0.284975	8.54814	1.25086e-17	3.9311e-16	CG10274	uncharacterized protein
265	FBgn0021760	1828.76	2.63567	0.308407	8.54606	1.27361e-17	3.98998e-16	chb	chromosome bows
266	FBgn0028538	1135.34	2.20586	0.258176	8.54402	1.29634e-17	4.04841e-16	Sec71	Secretory 71
267	FBgn0030286	3724.71	2.8469	0.333733	8.53047	1.45749e-17	4.5374e-16	CG1657	CG1657
268	FBgn0266672	3131.42	2.67106	0.313342	8.52441	1.53588e-17	4.76651e-16	Sec8	Secretory 8
269	FBgn0259735	1428.6	2.63988	0.309702	8.52395	1.54203e-17	4.77067e-16	CG42389	uncharacterized protein
270	FBgn0010825	2772.93	2.67805	0.314783	8.50761	1.77556e-17	5.45915e-16	Gug	Grunge
271	FBgn0029688	3015.1	2.91968	0.344109	8.48473	2.16212e-17	6.62717e-16	lva	lava lamp
272	FBgn0020261	3497.49	2.25053	0.265771	8.46794	2.49778e-17	7.63246e-16	pcm	pacman
273	FBgn0051224	3865.46	2.60431	0.307941	8.45718	2.73931e-17	8.31928e-16	CG31224	uncharacterized protein
274	FBgn0019890	1048.67	2.0806	0.246105	8.45413	2.81179e-17	8.51339e-16	Smg5	Smg5
275	FBgn0040212	691.102	2.58959	0.306329	8.45362	2.82416e-17	8.52483e-16	Dhap-at	Dihydroxyacetone phosphate acyltransferase
276	FBgn0037926	2727	2.25945	0.2678	8.43708	3.25362e-17	9.76183e-16	Elp1	Elongator complex protein 1
277	FBgn0020279	7505.92	2.59792	0.30801	8.43454	3.32507e-17	9.94617e-16	lig	lingerer
278	FBgn0038651	2786.08	3.21486	0.381975	8.41642	3.88175e-17	1.15765e-15	Epg5	ectopic P-granules autophagy protein 5
279	FBgn0040234	1991.28	2.11361	0.251906	8.39045	4.84302e-17	1.44e-15	c12.2	c12.2
280	FBgn0265988	1049.15	3.28209	0.391332	8.38699	4.98752e-17	1.47414e-15	mv	mauve
281	FBgn0036668	1134.28	2.56525	0.307549	8.34097	7.36846e-17	2.15224e-15	Zcchc7	Zinc finger CCHC-type containing 7
282	FBgn0051793	1356.7	2.34506	0.281355	8.33488	7.75768e-17	2.25268e-15	CG31793	uncharacterized protein
283	FBgn0005596	5603.59	2.3848	0.286331	8.32884	8.1639e-17	2.35685e-15	yem	yemanuclein
284	FBgn0026015	6459.21	2.20309	0.264867	8.31774	8.96547e-17	2.5733e-15	Top3beta	Topoisomerase 3beta
285	FBgn0033246	6937.76	2.65343	0.319061	8.31636	9.07036e-17	2.5959e-15	ACC	Acetyl-CoA carboxylase
286	FBgn0003415	3140.82	3.3613	0.404869	8.30218	1.0222e-16	2.91709e-15	skd	skuld
287	FBgn0013995	4313.96	2.3292	0.280571	8.30164	1.02683e-16	2.92191e-15	Calx	Na/Ca-exchange protein
288	FBgn0033713	3004.29	2.11121	0.25451	8.2952	1.084e-16	3.07578e-15	CG8841	CG8841
289	FBgn0027503	1750.03	2.29065	0.276191	8.29373	1.0975e-16	3.10072e-15	CG11970	uncharacterized protein
290	FBgn0035498	2852.51	2.00531	0.241791	8.29356	1.09904e-16	3.10072e-15	Fit1	Fermitin 1
291	FBgn0051678	1398.95	2.92345	0.352895	8.28417	1.18932e-16	3.34592e-15	CG31678	uncharacterized protein
292	FBgn0030946	3767.55	2.04932	0.247579	8.27743	1.25858e-16	3.53079e-15	CG6659	CG6659
293	FBgn0052529	1094.83	3.12475	0.377567	8.27601	1.27369e-16	3.55309e-15	Hers	Histone gene-specific Epigenetic Repressor in late S phase
294	FBgn0259228	1134.58	2.78934	0.338802	8.23295	1.82661e-16	5.02496e-15	C3G	C3G guanyl-nucleotide exchange factor
295	FBgn0003278	1886.61	2.2034	0.267754	8.22918	1.88502e-16	5.15707e-15	RpI135	RNA polymerase I 135kD subunit
296	FBgn0261243	3606.56	2.214	0.269227	8.22356	1.97554e-16	5.38985e-15	Psa	Puromycin sensitive aminopeptidase
297	FBgn0000317	1296.57	2.61808	0.318515	8.21966	2.04081e-16	5.55268e-15	ck	crinkled
298	FBgn0010309	2061.22	2.28908	0.278616	8.21589	2.10588e-16	5.71407e-15	pigeon	pigeon
299	FBgn0025743	2307.9	2.10203	0.255983	8.21158	2.18293e-16	5.89094e-15	mbt	mushroom bodies tiny
300	FBgn0016756	4648.1	2.63438	0.320805	8.21178	2.17931e-16	5.89094e-15	Usp47	Ubiquitin specific protease 47
301	FBgn0263929	1117.72	2.78853	0.339637	8.21033	2.20579e-16	5.9365e-15	jvl	javelin-like
302	FBgn0034346	2061.1	2.23196	0.271913	8.20839	2.24172e-16	6.01689e-15	CG12263	uncharacterized protein
303	FBgn0028476	2378.6	2.21584	0.270162	8.20188	2.3666e-16	6.33496e-15	Usp1	Ubiquitin specific protease 1
304	FBgn0023081	975.016	2.52135	0.307626	8.19617	2.48175e-16	6.62535e-15	gek	genghis khan
305	FBgn0028500	2239.55	2.4814	0.303494	8.17611	2.93147e-16	7.75098e-15	Rich	RIC1 homolog
306	FBgn0001108	2928.82	2.49491	0.305381	8.16983	3.08813e-16	8.11329e-15	DCTN1-p150	Dynactin 1, p150 subunit
307	FBgn0039466	1562.26	2.66476	0.326687	8.15692	3.4367e-16	8.98154e-15	CG5521	CG5521
308	FBgn0030343	2729.83	2.79041	0.342209	8.15412	3.51743e-16	9.16839e-15	ATP7	ATP7
309	FBgn0033757	10584.9	2.07267	0.254232	8.15266	3.56019e-16	9.25555e-15	muskelin	muskelin
310	FBgn0023172	1634.8	2.69987	0.331398	8.1469	3.73368e-16	9.65604e-15	RhoGEF2	Rho guanine nucleotide exchange factor 2
311	FBgn0039141	1946.88	2.13422	0.262233	8.13864	3.99751e-16	1.02848e-14	spas	spastin
312	FBgn0016641	2029.8	2.00106	0.245935	8.13653	4.06762e-16	1.04112e-14	PTP-ER	Protein tyrosine phosphatase-ERK/Enhancer of Ras1
313	FBgn0038889	588.402	2.49147	0.306326	8.13338	4.1747e-16	1.06578e-14	Fancm	Fanconi anemia group M helicase
314	FBgn0001186	1550.27	2.22573	0.273873	8.12687	4.40525e-16	1.12176e-14	Hex-A	Hexokinase A
315	FBgn0265082	179.442	3.93034	0.484088	8.11905	4.69844e-16	1.19336e-14	Cdep	Chondrocyte-derived ezrin-like domain containing protein
316	FBgn0039959	1598.25	3.08015	0.379437	8.11769	4.75133e-16	1.20371e-14	CG17514	uncharacterized protein
317	FBgn0003943	2430.59	2.2744	0.280608	8.10528	5.26257e-16	1.32984e-14	Ubi-p63E	Ubiquitin-63E
318	FBgn0033052	1127.14	2.30285	0.284236	8.1019	5.41086e-16	1.36384e-14	SCAP	SREBP cleavage activating protein
319	FBgn0039240	2000.43	2.2983	0.284359	8.08237	6.35179e-16	1.58891e-14	CG3744	CG3744
320	FBgn0031374	1500.68	2.78152	0.344708	8.06922	7.07469e-16	1.76087e-14	Wdr62	WD repeat domain 62
321	FBgn0004882	2989.09	2.77387	0.344222	8.05839	7.7307e-16	1.91934e-14	orb	oo18 RNA-binding protein
322	FBgn0033194	891.311	3.58057	0.444667	8.05225	8.12864e-16	2.0081e-14	Vps13	Vacuolar protein sorting 13
323	FBgn0050085	7977.71	2.65684	0.33084	8.03059	9.70054e-16	2.38456e-14	Rif1	Rap1 interacting factor 1
324	FBgn0037332	573.259	2.13041	0.265594	8.02129	1.04637e-15	2.56581e-14	Hcs	Holocarboxylase synthetase
325	FBgn0052451	2912.36	2.16621	0.270214	8.01666	1.08658e-15	2.65784e-14	SPoCk	Secretory Pathway Calcium atpase
326	FBgn0000319	6519.99	2.5967	0.323961	8.01546	1.09729e-15	2.67744e-14	Chc	Clathrin heavy chain
327	FBgn0037021	4260.07	2.21622	0.276946	8.00235	1.22069e-15	2.95675e-14	CG11399	uncharacterized protein
328	FBgn0037536	3060.79	2.31625	0.28952	8.0003	1.24117e-15	2.99904e-14	CG2698	CG2698
329	FBgn0260397	1425.82	2.58394	0.323577	7.98557	1.39871e-15	3.37151e-14	Su(var)3-3	Suppressor of variegation 3-3
330	FBgn0263144	3509.58	2.26637	0.284436	7.96793	1.6136e-15	3.86136e-14	bin3	bicoid-interacting protein 3
331	FBgn0085437	1937.44	2.37178	0.298029	7.95823	1.74516e-15	4.16614e-14	CG34408	uncharacterized protein
332	FBgn0020278	1687.34	2.70175	0.339549	7.95687	1.76448e-15	4.20217e-14	loco	locomotion defects
333	FBgn0034087	4845.74	2.74772	0.345549	7.95177	1.83871e-15	4.36849e-14	clu	clueless
334	FBgn0014075	3341.93	2.59138	0.32689	7.92735	2.2387e-15	5.29346e-14	Ugt	UDP-glucose-glycoprotein glucosyltransferase
335	FBgn0038286	1227.07	2.12503	0.268462	7.91559	2.46078e-15	5.80476e-14	CG6966	CG6966
336	FBgn0028484	1586.39	2.59165	0.327791	7.90642	2.64906e-15	6.21935e-14	Ack	Activated Cdc42 kinase
337	FBgn0029157	3842.98	2.19801	0.278076	7.90433	2.69375e-15	6.29451e-14	ssh	slingshot
338	FBgn0026252	16849.6	2.25605	0.285628	7.89856	2.82143e-15	6.57738e-14	msk	moleskin
339	FBgn0259789	3553.18	2.69625	0.341709	7.89048	3.01016e-15	6.98455e-14	zld	zelda
340	FBgn0035416	2562.15	2.68893	0.340977	7.88597	3.12097e-15	7.2248e-14	gry	gryzun
341	FBgn0024365	3690.14	2.05715	0.261009	7.88153	3.23387e-15	7.46874e-14	CG12773	uncharacterized protein
342	FBgn0020626	1905.28	2.31167	0.293593	7.87371	3.44288e-15	7.91463e-14	Osbp	Oxysterol binding protein
343	FBgn0026432	1263.77	2.66614	0.339063	7.86325	3.74298e-15	8.58466e-14	Grip163	Grip163
344	FBgn0261671	1522.89	3.62941	0.461596	7.86274	3.75832e-15	8.59997e-14	tweek	tweek
345	FBgn0014006	2086.98	2.14093	0.272643	7.8525	4.07826e-15	9.24685e-14	Ask1	Apoptotic signal-regulating kinase 1
346	FBgn0263231	2153.82	2.20866	0.281339	7.85051	4.14363e-15	9.37367e-14	bel	belle
347	FBgn0010303	1213.32	2.77612	0.353948	7.84329	4.38879e-15	9.9057e-14	hep	hemipterous
348	FBgn0023097	2251.23	2.4806	0.316286	7.84289	4.4028e-15	9.91479e-14	bon	bonus
349	FBgn0261444	2561.71	2.37384	0.302712	7.84191	4.43756e-15	9.97046e-14	CG3638	CG3638
350	FBgn0002783	5162.75	2.00104	0.255977	7.81727	5.39804e-15	1.20739e-13	mor	moira
351	FBgn0263005	1596.69	2.15213	0.276354	7.7876	6.82933e-15	1.51051e-13	CG43313	uncharacterized protein
352	FBgn0033313	1477.74	2.49058	0.320224	7.77761	7.39099e-15	1.62389e-13	Cirl	Calcium-independent receptor for alpha-latrotoxin
353	FBgn0259174	2645.35	2.22307	0.286002	7.77292	7.66969e-15	1.68141e-13	Nedd4	Nedd4
354	FBgn0003748	1552.95	2.0097	0.258756	7.76678	8.05057e-15	1.76102e-13	Treh	Trehalase
355	FBgn0000119	1245.36	2.64727	0.340925	7.76495	8.16796e-15	1.78277e-13	arr	arrow
356	FBgn0000247	2183.77	2.84191	0.366295	7.75853	8.59167e-15	1.86704e-13	ca	claret
357	FBgn0040388	2062.88	2.19627	0.283174	7.7559	8.77221e-15	1.89664e-13	boi	brother of ihog
358	FBgn0051637	811.158	2.13154	0.274825	7.756	8.76508e-15	1.89664e-13	CG31637	uncharacterized protein
359	FBgn0031078	6223.88	3.3807	0.435899	7.75571	8.78515e-15	1.89664e-13	Nup205	Nucleoporin 205kD
360	FBgn0053208	2569.39	2.34152	0.302079	7.75135	9.09233e-15	1.9587e-13	Mical	Molecule interacting with CasL
361	FBgn0039663	479.28	2.11304	0.272686	7.74901	9.2615e-15	1.98652e-13	CG2321	CG2321
362	FBgn0027079	6671	2.35785	0.30458	7.7413	9.84081e-15	2.10623e-13	ValRS	Valyl-tRNA synthetase
363	FBgn0032208	6146.14	2.89949	0.37477	7.73672	1.02011e-14	2.17866e-13	CG5604	CG5604
364	FBgn0262579	658.077	3.22979	0.417826	7.72998	1.07561e-14	2.28734e-13	Ect4	Ectoderm-expressed 4
365	FBgn0011674	406.32	2.43083	0.314522	7.72864	1.08704e-14	2.30671e-13	insc	inscuteable
366	FBgn0033636	1605.46	3.42133	0.44283	7.72606	1.10926e-14	2.33826e-13	tou	toutatis
367	FBgn0024191	740.51	2.23004	0.288765	7.72268	1.13911e-14	2.39164e-13	sip1	septin interacting protein 1
368	FBgn0039559	10532.4	2.35484	0.305131	7.71746	1.18666e-14	2.48624e-13	NSD	Nuclear receptor binding SET domain protein
369	FBgn0035833	688.039	2.7958	0.362287	7.7171	1.19011e-14	2.4882e-13	CG7565	CG7565
370	FBgn0024320	805.442	2.74643	0.355921	7.7164	1.19658e-14	2.49386e-13	Npc1a	Niemann-Pick type C-1a
371	FBgn0000017	1299.42	2.80093	0.36299	7.71627	1.19783e-14	2.49386e-13	Abl	Abl tyrosine kinase
372	FBgn0027528	870.566	2.05656	0.266538	7.71583	1.202e-14	2.49729e-13	goe	gone early
373	FBgn0264495	2457.02	2.52167	0.327636	7.69655	1.39787e-14	2.88014e-13	gpp	grappa
374	FBgn0020370	11713.7	2.79918	0.364422	7.68113	1.57685e-14	3.19586e-13	TppII	tripeptidyl-peptidase II
375	FBgn0043362	305.357	4.72015	0.615031	7.67465	1.65873e-14	3.33889e-13	bchs	blue cheese
376	FBgn0025639	3031.08	2.31942	0.302459	7.66853	1.7398e-14	3.48347e-13	Hmt4-20	Histone methyltransferase 4-20
377	FBgn0085434	389.794	3.11288	0.406459	7.65853	1.88076e-14	3.75056e-13	NaCP60E	Na channel protein 60E
378	FBgn0033460	2966.84	2.30618	0.301475	7.64966	2.01505e-14	3.99119e-13	Sec24AB	Secretory 24AB
379	FBgn0039182	3093.67	2.43036	0.317809	7.64723	2.0535e-14	4.05434e-13	CG5728	CG5728
380	FBgn0003416	700.123	2.23284	0.291993	7.64689	2.059e-14	4.05714e-13	sl	small wing
381	FBgn0052685	1518.98	2.32775	0.30453	7.64374	2.11001e-14	4.14121e-13	ZAP3	ZAP3
382	FBgn0039187	2863.91	2.23376	0.292441	7.63833	2.2005e-14	4.31029e-13	CG6454	CG6454
383	FBgn0042085	5146.62	2.34805	0.307519	7.63545	2.25036e-14	4.39927e-13	Bap170	Brahma associated protein 170kD
384	FBgn0003483	2209.55	2.29018	0.300286	7.62664	2.40942e-14	4.7004e-13	spn-E	spindle E
385	FBgn0016059	4298.57	2.05489	0.270071	7.60872	2.76834e-14	5.35914e-13	Sema1b	Semaphorin 1b
386	FBgn0016075	1132.59	4.61556	0.607091	7.60276	2.89892e-14	5.60101e-13	vkg	viking
387	FBgn0030354	1350.57	2.22482	0.292762	7.5994	2.97512e-14	5.73706e-13	Upf1	Upf1
388	FBgn0035420	1133.2	2.58933	0.340768	7.59851	2.99568e-14	5.76551e-13	CG14967	uncharacterized protein
389	FBgn0036368	57.5726	6.27321	0.827447	7.58141	3.41831e-14	6.5662e-13	CG10738	uncharacterized protein
390	FBgn0037074	1943.83	2.00005	0.263835	7.58066	3.43801e-14	6.59129e-13	CG7324	CG7324
391	FBgn0031390	2371.78	2.24432	0.296149	7.57833	3.50041e-14	6.69799e-13	tho2	tho2
392	FBgn0036004	4055.8	2.71815	0.359252	7.56614	3.84469e-14	7.34262e-13	Jarid2	Jumonji, AT rich interactive domain 2
393	FBgn0000463	617.569	2.4397	0.322635	7.56178	3.97587e-14	7.57858e-13	Dl	Delta
394	FBgn0261383	3290.47	2.84654	0.376763	7.55524	4.18087e-14	7.93885e-13	IntS6	Integrator 6
395	FBgn0053087	1354.92	3.40703	0.451101	7.55269	4.26354e-14	8.08038e-13	LRP1	LDL receptor protein 1
396	FBgn0001218	14611.6	2.11357	0.28016	7.54416	4.55209e-14	8.59446e-13	Hsc70-3	Heat shock 70-kDa protein cognate 3
397	FBgn0029912	3249.5	2.25943	0.300354	7.52256	5.37142e-14	1.00648e-12	CG4557	CG4557
398	FBgn0264305	435.043	2.3491	0.312293	7.52211	5.38991e-14	1.00804e-12	CG43783	uncharacterized protein
399	FBgn0027594	1852.47	2.36315	0.314603	7.51153	5.84391e-14	1.08885e-12	drpr	draper
400	FBgn0041210	887.036	2.67514	0.356225	7.5097	5.92647e-14	1.10217e-12	HDAC4	Histone deacetylase 4
401	FBgn0027086	4861.34	2.24249	0.298734	7.50665	6.06589e-14	1.12599e-12	IleRS	Isoleucyl-tRNA synthetase
402	FBgn0031118	816.343	2.69653	0.359718	7.49624	6.56725e-14	1.21205e-12	RhoGAP19D	Rho GTPase activating protein at 19D
403	FBgn0259221	1144.74	2.18689	0.291778	7.49506	6.62667e-14	1.21869e-12	CG42321	uncharacterized protein
404	FBgn0013576	2802.37	2.3773	0.317454	7.48862	6.95991e-14	1.26824e-12	mtd	mustard
405	FBgn0026597	2703.61	2.25073	0.300612	7.48715	7.03826e-14	1.28016e-12	Axn	Axin
406	FBgn0243511	2569.33	2.12813	0.284313	7.48517	7.14546e-14	1.29729e-12	psidin	phagocyte signaling impaired
407	FBgn0038244	5375.99	2.48069	0.331486	7.48354	7.23468e-14	1.30762e-12	CG7987	CG7987
408	FBgn0002526	680.094	3.91439	0.523246	7.48098	7.37716e-14	1.32963e-12	LanA	Laminin A
409	FBgn0283427	5672.31	3.50298	0.46839	7.47877	7.50229e-14	1.34973e-12	FASN1	Fatty acid synthase 1
410	FBgn0264855	2456.72	2.15137	0.288234	7.46396	8.39579e-14	1.50775e-12	AP-2alpha	Adaptor Protein complex 2, alpha subunit
411	FBgn0016977	4513.4	2.78116	0.372745	7.4613	8.56734e-14	1.53301e-12	spen	split ends
412	FBgn0263108	4993.63	2.27224	0.30494	7.45143	9.23366e-14	1.64927e-12	BtbVII	BTB-protein-VII
413	FBgn0261811	4531.95	2.51038	0.337246	7.44377	9.78546e-14	1.73845e-12	pico	pico
414	FBgn0003977	1781.78	3.42469	0.46011	7.44321	9.82706e-14	1.74272e-12	vir	virilizer
415	FBgn0260945	1413.67	2.56094	0.344105	7.44231	9.89373e-14	1.75142e-12	Atg1	Autophagy-related 1
416	FBgn0038304	1661.43	2.07202	0.278688	7.43491	1.04641e-13	1.8458e-12	CG12241	uncharacterized protein
417	FBgn0035424	1229.76	2.08389	0.280783	7.42171	1.15615e-13	2.03217e-12	CG11505	uncharacterized protein
418	FBgn0036398	1858.62	2.94546	0.396891	7.42134	1.15945e-13	2.03436e-12	upSET	upSET
419	FBgn0000414	1255.87	2.48478	0.335262	7.41145	1.24928e-13	2.18426e-12	Dab	Disabled
420	FBgn0001206	1631.61	2.17545	0.293578	7.41013	1.26179e-13	2.19855e-12	Hmr	Hybrid male rescue
421	FBgn0031799	1890.59	2.2815	0.308271	7.40097	1.3519e-13	2.34716e-12	Pez	Pez
422	FBgn0036913	1652.4	2.73647	0.369781	7.40025	1.35929e-13	2.35587e-12	Usp32	Ubiquitin specific protease 32
423	FBgn0004657	1483.23	2.016	0.27245	7.39952	1.36676e-13	2.36468e-12	mys	myospheroid
424	FBgn0030512	2166.43	2.12888	0.287956	7.39305	1.43495e-13	2.47405e-12	CG9940	CG9940
425	FBgn0053144	695.106	2.75823	0.373119	7.39236	1.44249e-13	2.48274e-12	CG33144	uncharacterized protein
426	FBgn0000721	5598.67	2.09224	0.283066	7.39137	1.45319e-13	2.49682e-12	for	foraging
427	FBgn0261553	1122.92	2.76665	0.375865	7.36075	1.82882e-13	3.10993e-12	CG42671	uncharacterized protein
428	FBgn0262167	1014.78	2.12985	0.289455	7.35814	1.86491e-13	3.16589e-12	ana1	anastral spindle 1
429	FBgn0039492	1813.33	2.42007	0.329049	7.35475	1.91291e-13	3.24183e-12	CG6051	CG6051
430	FBgn0032481	1086.7	2.06402	0.280837	7.34954	1.98885e-13	3.36478e-12	CG16972	uncharacterized protein
431	FBgn0027655	644.593	3.09257	0.420922	7.34714	2.025e-13	3.41931e-12	htt	huntingtin
432	FBgn0284256	5761.67	2.43625	0.33223	7.33303	2.25011e-13	3.78101e-12	bsf	bicoid stability factor
433	FBgn0027835	6390.85	2.46068	0.335739	7.32914	2.31636e-13	3.86618e-12	Dp1	Dodeca-satellite-binding protein 1
434	FBgn0013756	4644.88	2.16746	0.29651	7.3099	2.67337e-13	4.43967e-12	Mtor	Megator
435	FBgn0038168	4702.89	2.31172	0.316437	7.30545	2.7635e-13	4.58168e-12	omd	oocyte maintenance defects
436	FBgn0038349	2727.66	2.53288	0.346859	7.30233	2.82835e-13	4.68139e-12	AOX3	Aldehyde oxidase 3
437	FBgn0036566	2830.98	2.0624	0.282878	7.29076	3.08204e-13	5.0675e-12	ClC-c	Chloride channel-c
438	FBgn0004406	2126.38	2.25478	0.309706	7.2804	3.32824e-13	5.42738e-12	tam	tamas
439	FBgn0017448	1040.27	2.98367	0.409889	7.27922	3.35751e-13	5.46613e-12	CG2187	CG2187
440	FBgn0003656	1840.55	2.06626	0.28404	7.27454	3.47591e-13	5.64041e-12	sws	swiss cheese
441	FBgn0003444	552.422	2.38546	0.328095	7.27063	3.57807e-13	5.7967e-12	smo	smoothened
442	FBgn0034853	2756.06	2.05773	0.283116	7.26815	3.64447e-13	5.88508e-12	Ice1	Interacts with the C terminus of ELL 1
443	FBgn0038478	1899.62	2.53558	0.348948	7.26635	3.69326e-13	5.94454e-12	cal1	chromosome alignment defect 1
444	FBgn0250786	9082.38	2.39565	0.32975	7.26507	3.72853e-13	5.99159e-12	Chd1	Chromodomain-helicase-DNA-binding protein 1
445	FBgn0000382	827.205	2.22137	0.306112	7.2567	3.96637e-13	6.36349e-12	csw	corkscrew
446	FBgn0262872	7046.5	2.19021	0.302335	7.24432	4.34602e-13	6.91672e-12	milt	milton
447	FBgn0021818	1620.91	2.14205	0.29587	7.23984	4.4923e-13	7.12668e-12	cnk	connector enhancer of ksr
448	FBgn0023407	3231.73	2.44892	0.338472	7.23524	4.64713e-13	7.3255e-12	B4	B4
449	FBgn0000163	867.12	2.91528	0.403387	7.227	4.93767e-13	7.73439e-12	baz	bazooka
450	FBgn0037659	1534.72	2.56466	0.35519	7.22054	5.17828e-13	8.08576e-12	Kdm2	Lysine (K)-specific demethylase 2
451	FBgn0002905	976.853	2.45559	0.340426	7.21328	5.46219e-13	8.48905e-12	mus308	mutagen-sensitive 308
452	FBgn0261550	1963.5	2.10279	0.291842	7.20524	5.79424e-13	8.99103e-12	CG42668	uncharacterized protein
453	FBgn0004368	2136.3	2.36233	0.327897	7.20449	5.82594e-13	9.02611e-12	Ptp4E	Protein tyrosine phosphatase 4E
454	FBgn0004864	1129.2	2.04107	0.284173	7.1825	6.8447e-13	1.05551e-11	hop	hopscotch
455	FBgn0030812	990.308	2.47806	0.34538	7.17487	7.23764e-13	1.11265e-11	wcy	wacky
456	FBgn0037218	2613.41	2.03923	0.284305	7.17267	7.35509e-13	1.12896e-11	aux	auxilin
457	FBgn0031897	645.795	2.09828	0.292636	7.17027	7.48499e-13	1.14535e-11	CG13784	uncharacterized protein
458	FBgn0026428	5120.27	2.37091	0.33132	7.15595	8.30926e-13	1.26953e-11	HDAC6	Histone deacetylase 6
459	FBgn0085423	924.778	2.09158	0.292294	7.15573	8.32272e-13	1.26963e-11	CG34394	uncharacterized protein
460	FBgn0035802	1572.87	2.60051	0.363526	7.15357	8.45488e-13	1.28781e-11	Pura	Puratrophin-1-like
461	FBgn0034401	5413.75	2.12796	0.297551	7.15159	8.57759e-13	1.3045e-11	MetRS	Methionyl-tRNA synthetase
462	FBgn0003701	1730.58	2.01211	0.281407	7.15019	8.66586e-13	1.31397e-11	thr	three rows
463	FBgn0032796	1891.39	2.14554	0.300466	7.1407	9.2855e-13	1.39719e-11	CG10188	uncharacterized protein
464	FBgn0037344	4444.04	2.8391	0.397964	7.13406	9.74516e-13	1.46192e-11	CG2926	CG2926
465	FBgn0050122	2566.64	2.06456	0.289443	7.13286	9.83012e-13	1.47244e-11	CG30122	uncharacterized protein
466	FBgn0015279	2597.72	2.07349	0.290999	7.12542	1.03765e-12	1.55195e-11	Pi3K92E	Pi3K92E
467	FBgn0025802	884.315	2.38879	0.335739	7.11502	1.11894e-12	1.67101e-11	Sbf	SET domain binding factor
468	FBgn0053558	1482.84	2.40514	0.338235	7.11086	1.15326e-12	1.71968e-11	mim	missing-in-metastasis
469	FBgn0035793	1726.02	2.27974	0.321298	7.0954	1.28978e-12	1.91461e-11	CG7546	CG7546
470	FBgn0032006	69.6587	5.57877	0.786457	7.09355	1.30719e-12	1.93757e-11	Pvr	PDGF- and VEGF-receptor related
471	FBgn0010352	3522.78	2.25032	0.317529	7.08697	1.37084e-12	2.02586e-11	Nc73EF	Neural conserved at 73EF
472	FBgn0025681	2989.75	2.21366	0.312438	7.08512	1.3892e-12	2.04995e-11	CG3558	CG3558
473	FBgn0033212	1431.7	2.50612	0.353832	7.08278	1.41288e-12	2.0818e-11	LRR	Leucine-rich repeat
474	FBgn0030087	6102.6	2.22847	0.314847	7.07796	1.46296e-12	2.14921e-11	CG7766	CG7766
475	FBgn0261556	556.129	2.44279	0.345294	7.07453	1.49951e-12	2.19317e-11	CG42674	uncharacterized protein
476	FBgn0004611	1458.73	2.23544	0.316012	7.07389	1.5065e-12	2.20016e-11	Plc21C	Phospholipase C at 21C
477	FBgn0026679	3392.68	2.10868	0.29847	7.06494	1.60682e-12	2.33636e-11	IntS4	Integrator 4
478	FBgn0000581	4114.06	2.58407	0.365939	7.06147	1.64755e-12	2.39208e-11	E(Pc)	Enhancer of Polycomb
479	FBgn0263747	303.008	3.46169	0.490651	7.05529	1.72235e-12	2.49339e-11	CG43672	uncharacterized protein
480	FBgn0000547	847.889	2.44137	0.346369	7.04846	1.80904e-12	2.61127e-11	ed	echinoid
481	FBgn0020647	2330.13	2.54455	0.361645	7.03605	1.9777e-12	2.83004e-11	KrT95D	Krueppel target at 95D
482	FBgn0259984	384.739	2.67756	0.381861	7.01187	2.35157e-12	3.33621e-11	kuz	kuzbanian
483	FBgn0262614	2151.31	2.46667	0.351825	7.01107	2.36511e-12	3.35063e-11	pyd	polychaetoid
484	FBgn0004606	847.487	2.19562	0.313216	7.00992	2.38448e-12	3.37326e-11	zfh1	Zn finger homeodomain 1
485	FBgn0001986	3075.82	2.25358	0.321588	7.00767	2.42314e-12	3.42308e-11	Mtr4	Mtr4 helicase
486	FBgn0263601	2502.12	2.1423	0.305784	7.00592	2.4536e-12	3.45627e-11	mib1	mind bomb 1
487	FBgn0264560	2512.82	2.79192	0.3989	6.99906	2.57692e-12	3.62484e-11	garz	gartenzwerg
488	FBgn0030631	5166.59	2.0139	0.287967	6.9935	2.68104e-12	3.76065e-11	CG6227	CG6227
489	FBgn0024277	1132.22	2.84027	0.406373	6.98933	2.76201e-12	3.86695e-11	trio	trio
490	FBgn0031990	1480.87	2.72797	0.390406	6.98753	2.79769e-12	3.90771e-11	PAPLA1	Phosphatidic Acid Phospholipase A1
491	FBgn0034060	2329.76	2.05067	0.29357	6.98528	2.84285e-12	3.96522e-11	CG8370	CG8370
492	FBgn0052479	3179.19	2.41913	0.346502	6.98157	2.91896e-12	4.05429e-11	Usp10	Ubiquitin specific protease 10
493	FBgn0020379	684.538	2.38676	0.342926	6.95999	3.4029e-12	4.68064e-11	Rfx	Rfx
494	FBgn0026575	2254.52	2.3159	0.332838	6.95805	3.4502e-12	4.73259e-11	hang	hangover
495	FBgn0031052	5996.95	2.51506	0.362299	6.94195	3.86723e-12	5.26461e-11	CG14215	uncharacterized protein
496	FBgn0036828	2001.46	2.13082	0.306953	6.94185	3.86986e-12	5.26461e-11	CG6841	CG6841
497	FBgn0002891	1174.54	2.57553	0.371098	6.9403	3.91262e-12	5.30823e-11	mus205	mutagen-sensitive 205
498	FBgn0260003	622.202	3.11266	0.449531	6.92425	4.38299e-12	5.89006e-11	Dys	Dystrophin
499	FBgn0036702	5641.96	2.24953	0.325158	6.91827	4.57181e-12	6.12722e-11	CG6512	CG6512
500	FBgn0261794	1140.57	2.04415	0.295865	6.90906	4.87872e-12	6.48683e-11	kcc	kazachoc
501	FBgn0020497	4716.03	2.00733	0.29058	6.908	4.9152e-12	6.52578e-11	emb	embargoed
502	FBgn0038427	3512.49	2.0581	0.297991	6.90659	4.96453e-12	6.57369e-11	ema	endosomal maturation defective
503	FBgn0026059	2113.99	2.73499	0.396066	6.90539	5.00647e-12	6.61593e-11	Mhcl	Myosin heavy chain-like
504	FBgn0035073	682.042	2.26735	0.328758	6.8967	5.32229e-12	7.01934e-11	CG16896	uncharacterized protein
505	FBgn0061200	3181.14	2.25244	0.327322	6.88143	5.92544e-12	7.77351e-11	Nup153	Nucleoporin 153kD
506	FBgn0025866	1073.85	2.12891	0.309448	6.87972	5.99716e-12	7.85724e-11	CalpB	Calpain-B
507	FBgn0000562	2674.77	2.37237	0.344917	6.87808	6.0664e-12	7.93748e-11	egl	egalitarian
508	FBgn0033339	1790.69	2.10758	0.3067	6.87181	6.33929e-12	8.28361e-11	Sec31	Secretory 31
509	FBgn0037530	4775.32	2.08643	0.303676	6.87059	6.39368e-12	8.34371e-11	EMC1	ER Membrane protein Complex 1
510	FBgn0262103	904.673	2.57353	0.375332	6.85668	7.0477e-12	9.13716e-11	Sik3	Salt-inducible kinase 3
511	FBgn0004373	3073.27	2.36742	0.345619	6.84979	7.39569e-12	9.52615e-11	fwd	four wheel drive
512	FBgn0031456	1721.15	2.0536	0.299872	6.84824	7.4763e-12	9.6175e-11	Trn-SR	Transportin-Serine/Arginine rich
513	FBgn0016031	2170.88	2.01159	0.293988	6.8424	7.78771e-12	1.00051e-10	lama	lamina ancestor
514	FBgn0261787	2530.04	2.66811	0.390634	6.83022	8.47837e-12	1.08086e-10	brun	brunelleschi
515	FBgn0267828	900.798	2.14044	0.313515	6.82725	8.65591e-12	1.10208e-10	Fatp	Fatty acid (long chain) transport protein
516	FBgn0031420	2287.59	2.20348	0.322911	6.82382	8.86523e-12	1.12584e-10	Atxn7	Ataxin 7
517	FBgn0035106	1697.92	2.9415	0.431127	6.82282	8.92705e-12	1.13224e-10	rno	rhinoceros
518	FBgn0283712	915.908	2.27051	0.33298	6.81874	9.18399e-12	1.16334e-10	LIMK1	LIM domain kinase 1
519	FBgn0261385	5315.15	2.0808	0.305319	6.81516	9.41621e-12	1.19124e-10	scra	scraps
520	FBgn0004449	619.787	3.89945	0.572408	6.81237	9.60057e-12	1.21302e-10	Ten-m	Tenascin major
521	FBgn0027342	1935.24	2.09097	0.306954	6.81201	9.62466e-12	1.21452e-10	fz4	frizzled 4
522	FBgn0262517	932.402	2.35749	0.346166	6.8103	9.73969e-12	1.22421e-10	Ltn1	Listerin E3 ubiquitin protein ligase 1
523	FBgn0027500	11843	2.16473	0.318749	6.79134	1.111e-11	1.37917e-10	spd-2	spindle defective 2
524	FBgn0039640	11723.1	2.06633	0.304326	6.78985	1.12249e-11	1.39169e-10	CG14516	uncharacterized protein
525	FBgn0264090	406.505	2.07573	0.305838	6.78705	1.14451e-11	1.41722e-10	CG43759	uncharacterized protein
526	FBgn0033482	3267.84	2.17138	0.321137	6.76153	1.36544e-11	1.6741e-10	CG1371	CG1371
527	FBgn0030520	1403.96	2.10872	0.31189	6.7611	1.36951e-11	1.67702e-10	Pdcd4	Programmed cell death 4
528	FBgn0003175	2125.93	2.87374	0.425485	6.75404	1.43788e-11	1.75857e-10	px	plexus
529	FBgn0002044	2658.21	2.31256	0.342877	6.74459	1.53461e-11	1.87226e-10	swm	second mitotic wave missing
530	FBgn0031077	1066.71	2.77693	0.411758	6.74407	1.54007e-11	1.87662e-10	CG15618	uncharacterized protein
531	FBgn0030486	2699.59	2.47252	0.367157	6.73424	1.64789e-11	1.99575e-10	Set2	SET domain containing 2
532	FBgn0003557	3836.08	2.04644	0.304337	6.72424	1.76514e-11	2.12461e-10	Su(dx)	Suppressor of deltex
533	FBgn0261988	739.2	2.11666	0.314811	6.72358	1.77309e-11	2.12921e-10	Gprk2	G protein-coupled receptor kinase 2
534	FBgn0259785	5029.51	2.06717	0.307496	6.7226	1.7851e-11	2.14104e-10	pzg	putzig
535	FBgn0005390	5670.34	2.31466	0.344355	6.72172	1.79595e-11	2.15146e-10	fs(1)M3	female sterile (1) M3
536	FBgn0024806	1721.61	2.05074	0.305395	6.71504	1.88016e-11	2.24421e-10	DIP2	DISCO Interacting Protein 2
537	FBgn0263102	1209.94	2.10499	0.313622	6.71187	1.92144e-11	2.29073e-10	psq	pipsqueak
538	FBgn0263352	502.976	2.33786	0.348527	6.70784	1.97523e-11	2.34922e-10	Unr	Upstream of N-ras
539	FBgn0035270	755.229	2.05319	0.307494	6.67718	2.43577e-11	2.84584e-10	CG13933	uncharacterized protein
540	FBgn0037371	2693.78	2.00908	0.300914	6.6766	2.44555e-11	2.85391e-10	Sym	Symplekin
541	FBgn0030018	1009.87	2.29336	0.343525	6.67595	2.45628e-11	2.86307e-10	slpr	slipper
542	FBgn0036374	1391.06	3.03912	0.455683	6.66937	2.56896e-11	2.9874e-10	Spt20	Spt20
543	FBgn0004456	105.159	5.04572	0.757171	6.66392	2.66621e-11	3.08603e-10	mew	multiple edematous wings
544	FBgn0036032	400.77	2.38385	0.358594	6.64778	2.97554e-11	3.42411e-10	CG16711	uncharacterized protein
545	FBgn0024698	2416.99	2.57441	0.387319	6.64674	2.99663e-11	3.44041e-10	Cpsf160	Cleavage and polyadenylation specificity factor 160
546	FBgn0030466	852.766	2.63473	0.396618	6.64299	3.07382e-11	3.52089e-10	CG15744	uncharacterized protein
547	FBgn0011655	1423.41	2.45343	0.369978	6.63127	3.32811e-11	3.79465e-10	Med	Medea
548	FBgn0029088	1343.84	2.12644	0.320727	6.63006	3.3554e-11	3.82139e-10	disp	dispatched
549	FBgn0029979	1618.21	2.11888	0.319831	6.62501	3.47213e-11	3.94528e-10	mahe	maheshvara
550	FBgn0284254	2203.05	2.25134	0.339877	6.62398	3.49655e-11	3.96849e-10	Ranbp11	Ranbp11
551	FBgn0264561	4621.97	2.43027	0.367035	6.62135	3.5593e-11	4.03509e-10	Glg1	Golgi complex-localized glycoprotein 1
552	FBgn0004387	987.333	2.61967	0.395941	6.61631	3.68274e-11	4.17028e-10	Klp98A	Kinesin-like protein at 98A
553	FBgn0037116	1622.34	2.65331	0.401336	6.6112	3.81225e-11	4.3071e-10	Als2	Amyotrophic lateral sclerosis 2
554	FBgn0028916	3514.18	2.21003	0.334652	6.60397	4.00299e-11	4.51234e-10	CG33090	uncharacterized protein
555	FBgn0031023	1923.08	2.31618	0.351101	6.59691	4.19815e-11	4.72697e-10	CG14200	uncharacterized protein
556	FBgn0036741	1935.76	2.0624	0.312842	6.59247	4.32561e-11	4.85947e-10	CG7510	CG7510
557	FBgn0037142	696.748	2.11703	0.321143	6.59215	4.3349e-11	4.86439e-10	CG14562	uncharacterized protein
558	FBgn0085451	1411.94	2.60403	0.395277	6.58787	4.46166e-11	5.00099e-10	htk	hat-trick
559	FBgn0029840	1894.5	2.821	0.428788	6.57902	4.73546e-11	5.27809e-10	raptor	raptor
560	FBgn0261547	407.045	2.44119	0.371145	6.57744	4.78608e-11	5.32257e-10	Exn	Ephexin
561	FBgn0030809	1528.14	2.47842	0.377038	6.57339	4.91829e-11	5.45129e-10	Ubr1	Ubr1 ubiquitin ligase
562	FBgn0026573	1341.79	2.05915	0.313431	6.5697	5.04163e-11	5.57554e-10	ADD1	ADD domain-containing protein 1
563	FBgn0042177	2056.41	2.19865	0.3349	6.56508	5.20056e-11	5.74491e-10	CG32164	uncharacterized protein
564	FBgn0027330	3019.38	2.03587	0.3102	6.56308	5.27081e-11	5.81604e-10	l(1)G0020	lethal (1) G0020
565	FBgn0038344	1610.77	2.72231	0.415149	6.55743	5.47421e-11	6.02709e-10	obe	obelus
566	FBgn0261873	606.022	2.74258	0.419219	6.54213	6.06481e-11	6.62592e-10	sdt	stardust
567	FBgn0027951	2150.12	2.23159	0.341589	6.53296	6.4483e-11	7.02213e-10	MTA1-like	Metastasis associated 1-like
568	FBgn0036116	242.743	5.0254	0.769239	6.53295	6.44868e-11	7.02213e-10	CG7888	CG7888
569	FBgn0031051	3556.02	2.48669	0.381079	6.52538	6.7831e-11	7.3782e-10	Ranbp21	Ranbp21
570	FBgn0000541	1785.04	2.56633	0.39343	6.52297	6.89267e-11	7.48918e-10	E(bx)	Enhancer of bithorax
571	FBgn0050372	1865.17	2.12842	0.326687	6.51518	7.26009e-11	7.85403e-10	Asap	ArfGAP with SH3 domain, ankyrin repeat and PH domain
572	FBgn0025830	1544.58	2.20074	0.337858	6.5138	7.32732e-11	7.91813e-10	IntS8	Integrator 8
573	FBgn0265102	1444.86	2.21447	0.34031	6.5072	7.65625e-11	8.24666e-10	Oseg1	Outer segment 1
574	FBgn0019968	1138.28	2.30954	0.355443	6.49763	8.15973e-11	8.77945e-10	Khc-73	Kinesin heavy chain 73
575	FBgn0267912	381.809	2.14749	0.331236	6.48326	8.97601e-11	9.61604e-10	CanA-14F	Calcineurin A at 14F
576	FBgn0035001	2222.75	2.16021	0.333238	6.48249	9.02226e-11	9.63442e-10	Slik	Sterile20-like kinase
577	FBgn0003575	1464.84	2.19809	0.339334	6.47765	9.3162e-11	9.90569e-10	su(sable)	suppressor of sable
578	FBgn0025724	4495.65	2.40038	0.370882	6.4721	9.66488e-11	1.02435e-09	beta'COP	Coat Protein (coatomer) beta'
579	FBgn0250757	78.2306	4.17955	0.646538	6.46451	1.01628e-10	1.07483e-09	CG42235	uncharacterized protein
580	FBgn0035060	5249.98	2.31677	0.358661	6.45948	1.05063e-10	1.10837e-09	Eps-15	Epidermal growth factor receptor pathway substrate clone 15
581	FBgn0004509	566.419	2.23633	0.346282	6.4581	1.06025e-10	1.11658e-09	Fur1	Furin 1
582	FBgn0032517	682.144	2.32671	0.360293	6.45783	1.06212e-10	1.11737e-09	CG7099	CG7099
583	FBgn0022786	1851.76	2.05638	0.319225	6.4418	1.18068e-10	1.23165e-09	Hira	hira
584	FBgn0002441	2413.57	2.31275	0.359149	6.43953	1.19848e-10	1.24891e-09	l(3)mbt	lethal (3) malignant brain tumor
585	FBgn0004370	583.199	2.59404	0.402882	6.43871	1.20494e-10	1.25432e-09	Ptp10D	Protein tyrosine phosphatase 10D
586	FBgn0086442	2548.17	2.36063	0.366702	6.43746	1.21488e-10	1.26203e-09	mib2	mind bomb 2
587	FBgn0034641	3105.91	2.20292	0.343201	6.41876	1.37387e-10	1.41505e-09	mahj	mahjong
588	FBgn0260486	272.579	3.15656	0.4918	6.41838	1.37733e-10	1.41505e-09	Ziz	Zizimin
589	FBgn0003165	1117.93	2.70182	0.420981	6.41792	1.38146e-10	1.41582e-09	pum	pumilio
590	FBgn0023441	2749.03	2.21215	0.344824	6.4153	1.40543e-10	1.4389e-09	fus	fusilli
591	FBgn0050421	913.007	2.39267	0.373149	6.41212	1.43512e-10	1.46477e-09	Usp15-31	Ubiquitin specific protease 15/31
592	FBgn0284251	3252.09	2.28259	0.356117	6.40966	1.45843e-10	1.48703e-09	l(2)05287	lethal (2) 05287
593	FBgn0004378	1653.21	2.22055	0.346565	6.40731	1.48109e-10	1.50704e-09	Klp61F	Kinesin-like protein at 61F
594	FBgn0030243	2065.5	2.22311	0.347032	6.40608	1.4931e-10	1.5146e-09	CG2186	CG2186
595	FBgn0026616	576.546	2.38101	0.371797	6.40407	1.51286e-10	1.53152e-09	alpha-Man-IIb	alpha-Mannosidase class II b
596	FBgn0033376	546.434	2.09104	0.326963	6.39535	1.60184e-10	1.61501e-09	CG8777	CG8777
597	FBgn0259168	802.644	2.10839	0.330103	6.38706	1.69108e-10	1.70153e-09	mnb	minibrain
598	FBgn0000352	1570.51	2.83873	0.444498	6.38637	1.69868e-10	1.70573e-09	cos	costa
599	FBgn0025725	5384.02	2.7163	0.425384	6.38553	1.70802e-10	1.71337e-09	alphaCOP	Coat Protein (coatomer) alpha
600	FBgn0262739	617.105	2.46769	0.386468	6.38523	1.71144e-10	1.71507e-09	AGO1	Argonaute-1
601	FBgn0026713	2339.66	2.45746	0.385323	6.37765	1.79824e-10	1.7948e-09	l(1)G0007	lethal (1) G0007
602	FBgn0021761	6587.96	2.31592	0.363279	6.37504	1.82911e-10	1.82013e-09	Nup154	Nucleoporin 154kD
603	FBgn0051151	1704.26	2.52839	0.396868	6.37086	1.87975e-10	1.86678e-09	wge	winged eye
604	FBgn0039338	3115.72	2.00512	0.314751	6.37048	1.88434e-10	1.86947e-09	XNP	XNP
605	FBgn0032123	758.201	2.55534	0.401255	6.36838	1.91041e-10	1.89344e-09	Oatp30B	Organic anion transporting polypeptide 30B
606	FBgn0053180	1133.65	2.02355	0.318051	6.36237	1.98667e-10	1.95499e-09	Ranbp16	Ranbp16
607	FBgn0003301	48.7964	4.07568	0.640892	6.35939	2.02559e-10	1.9858e-09	rut	rutabaga
608	FBgn0026181	3153.05	2.38121	0.374463	6.359	2.03078e-10	1.98892e-09	Rok	Rho kinase
609	FBgn0017561	3962.95	2.05059	0.32266	6.35526	2.08069e-10	2.03379e-09	Ork1	Open rectifier K[+] channel 1
610	FBgn0261793	528.042	2.63886	0.415302	6.35407	2.09692e-10	2.04764e-09	Trf2	TATA box binding protein-related factor 2
611	FBgn0041111	475.932	2.40683	0.379017	6.3502	2.1503e-10	2.09564e-09	lilli	lilliputian
612	FBgn0038740	185.89	3.4796	0.549338	6.33416	2.38631e-10	2.30754e-09	CG4562	CG4562
613	FBgn0037301	1471.22	2.03825	0.321851	6.3329	2.40603e-10	2.32434e-09	Mms19	Mms19
614	FBgn0039026	860.662	2.42917	0.383835	6.32868	2.47259e-10	2.37929e-09	CG7029	CG7029
615	FBgn0284220	7312.69	2.07405	0.327785	6.32748	2.49194e-10	2.39337e-09	Top2	Topoisomerase 2
616	FBgn0037702	1916.56	2.08869	0.330164	6.32623	2.51225e-10	2.40458e-09	CG8176	CG8176
617	FBgn0051992	6019.78	2.08958	0.33114	6.31027	2.7855e-10	2.63706e-09	gw	gawky
618	FBgn0028509	919.417	2.4262	0.38472	6.30641	2.8559e-10	2.69857e-09	CenG1A	Centaurin gamma 1A
619	FBgn0004463	1373.06	2.14964	0.340923	6.30536	2.87521e-10	2.71165e-09	RpIII128	RNA polymerase III 128kD subunit
620	FBgn0030858	3793.18	2.35272	0.373437	6.30019	2.97285e-10	2.79842e-09	IntS2	Integrator 2
621	FBgn0033252	86.4487	3.76818	0.599349	6.28712	3.23417e-10	3.03578e-09	CG12769	uncharacterized protein
622	FBgn0032363	1740.55	2.59306	0.412926	6.27973	3.39155e-10	3.1745e-09	Dlg5	Discs large 5
623	FBgn0260655	1683.18	2.39863	0.382165	6.27643	3.46443e-10	3.23358e-09	l(3)76BDm	lethal (3) 76BDm
624	FBgn0083969	1719.11	2.23747	0.357011	6.26724	3.6751e-10	3.41736e-09	CG34133	uncharacterized protein
625	FBgn0263998	1823.25	2.16617	0.345627	6.26736	3.67213e-10	3.41736e-09	Ack-like	Activated Cdc42 kinase-like
626	FBgn0033479	300.061	2.31497	0.370083	6.25527	3.96837e-10	3.66263e-09	CG2292	CG2292
627	FBgn0034498	1943.33	2.30059	0.367949	6.25246	4.04027e-10	3.7172e-09	CG16868	uncharacterized protein
628	FBgn0010660	2471.08	2.43098	0.389243	6.24541	4.22694e-10	3.87964e-09	Nup214	Nucleoporin 214kD
629	FBgn0010762	1112.94	2.01899	0.323336	6.24424	4.25869e-10	3.90517e-09	simj	simjang
630	FBgn0011836	2367.11	2.00987	0.322319	6.23565	4.49903e-10	4.10283e-09	Taf2	TBP-associated factor 2
631	FBgn0015772	1450.58	2.06246	0.331396	6.22356	4.85998e-10	4.41578e-09	Nak	Numb-associated kinase
632	FBgn0263490	1890.46	2.06301	0.331568	6.22199	4.90878e-10	4.45197e-09	mld	molting defective
633	FBgn0085370	656.862	2.37951	0.382844	6.21534	5.1213e-10	4.6236e-09	Pde11	Phosphodiesterase 11
634	FBgn0261823	691.951	2.18276	0.352421	6.1936	5.88037e-10	5.24689e-09	Asx	Additional sex combs
635	FBgn0002774	571.072	2.32495	0.375421	6.19291	5.90632e-10	5.26532e-09	mle	maleless
636	FBgn0029893	2320.14	2.19363	0.354933	6.1804	6.39376e-10	5.65921e-09	CG14442	uncharacterized protein
637	FBgn0010328	6674.57	2.0685	0.33567	6.16229	7.16999e-10	6.31251e-09	woc	without children
638	FBgn0038475	364.179	2.32616	0.377532	6.16149	7.20616e-10	6.33874e-09	Keap1	Keap1
639	FBgn0262647	2411.87	2.71461	0.441576	6.14755	7.86904e-10	6.88524e-09	Nup160	Nucleoporin 160kD
640	FBgn0015513	1858.19	2.07893	0.338592	6.13991	8.25677e-10	7.1865e-09	mbc	myoblast city
641	FBgn0031377	1018.11	2.034	0.331861	6.12906	8.83977e-10	7.65904e-09	CG15356	uncharacterized protein
642	FBgn0039527	44.9797	5.44988	0.892058	6.10933	1.0005e-09	8.61745e-09	CG5639	CG5639
643	FBgn0030246	3143.46	2.27318	0.372501	6.10247	1.04443e-09	8.98809e-09	CG1582	CG1582
644	FBgn0002873	2070.9	2.54187	0.416623	6.10112	1.05326e-09	9.04836e-09	mud	mushroom body defect
645	FBgn0264895	444.338	2.55176	0.418746	6.09382	1.10249e-09	9.44677e-09	RapGAP1	Rap GTPase activating protein 1
646	FBgn0265630	877.862	2.76248	0.453997	6.08479	1.16642e-09	9.96879e-09	sno	strawberry notch
647	FBgn0023510	1208.61	2.58856	0.425438	6.08447	1.16875e-09	9.98007e-09	Rbcn-3B	Rabconnectin-3B
648	FBgn0033087	833.642	2.28359	0.375368	6.0836	1.17511e-09	1.00258e-08	Hsepi	Heparan sulfate C5-epimerase
649	FBgn0039633	2003.52	2.51486	0.413604	6.08036	1.19911e-09	1.02217e-08	CG11873	uncharacterized protein
650	FBgn0262733	1780.52	2.02857	0.333793	6.07735	1.22188e-09	1.03891e-08	Src64B	Src oncogene at 64B
651	FBgn0039117	1005.65	2.26665	0.374256	6.0564	1.392e-09	1.17152e-08	tst	twister
652	FBgn0263346	916	2.38952	0.394672	6.05444	1.40906e-09	1.18287e-08	CG43427	uncharacterized protein
653	FBgn0039209	548.561	2.19634	0.363123	6.04848	1.46216e-09	1.22358e-08	REPTOR	Repressed by TOR
654	FBgn0261574	1145.35	3.22459	0.53342	6.04513	1.49289e-09	1.24587e-08	kug	kugelei
655	FBgn0000578	884.109	2.01539	0.333408	6.0448	1.496e-09	1.24742e-08	ena	enabled
656	FBgn0263705	718.969	3.65873	0.605501	6.04248	1.51767e-09	1.26443e-08	Myo10A	Myosin 10A
657	FBgn0023095	43.6569	5.1069	0.845311	6.04145	1.52736e-09	1.27143e-08	caps	capricious
658	FBgn0000667	3003.69	2.23851	0.371248	6.02969	1.64278e-09	1.35654e-08	Actn	alpha actinin
659	FBgn0027780	1169.81	2.06641	0.342709	6.02964	1.64326e-09	1.35654e-08	U26	U26
660	FBgn0263667	2025.66	2.32916	0.387316	6.01359	1.81457e-09	1.49053e-08	Lpt	Lost PHDs of trr
661	FBgn0027094	7989.95	2.28123	0.379604	6.00949	1.86104e-09	1.52492e-08	AlaRS	Alanyl-tRNA synthetase
662	FBgn0267002	736.797	2.27478	0.378771	6.00568	1.90527e-09	1.55731e-08	unc-104	uncoordinated-104
663	FBgn0086359	870.298	2.23804	0.372671	6.0054	1.90856e-09	1.55871e-08	Invadolysin	invadolysin
664	FBgn0029992	630.806	2.16199	0.360153	6.00299	1.9372e-09	1.5808e-08	Upf2	Upf2
665	FBgn0028421	1432.85	2.2798	0.379791	6.00278	1.93968e-09	1.58153e-08	Kap3	Kinesin associated protein 3
666	FBgn0243516	618.348	2.45818	0.409701	5.99993	1.97403e-09	1.60557e-08	Vrp1	Verprolin 1
667	FBgn0030869	376.023	2.58964	0.432286	5.99058	2.09093e-09	1.69234e-08	Socs16D	Suppressor of Cytokine Signaling at 16D
668	FBgn0002183	7443.44	2.08526	0.34816	5.98938	2.10644e-09	1.70212e-08	dre4	dre4
669	FBgn0036684	841.432	2.71599	0.453926	5.98333	2.18624e-09	1.76373e-08	CG3764	CG3764
670	FBgn0034598	2273.74	2.08263	0.348204	5.98106	2.2169e-09	1.78702e-08	CG4266	CG4266
671	FBgn0083956	142.724	3.73421	0.62457	5.97885	2.24725e-09	1.80708e-08	CG34120	uncharacterized protein
672	FBgn0026577	1704.1	2.83848	0.4752	5.97323	2.32607e-09	1.86365e-08	CG8677	CG8677
673	FBgn0266557	8186.44	3.05558	0.511552	5.97316	2.32698e-09	1.86365e-08	kis	kismet
674	FBgn0284408	712.815	3.67174	0.615068	5.96966	2.37748e-09	1.89645e-08	NA	NA
675	FBgn0262617	593.175	2.05308	0.344643	5.95713	2.56711e-09	2.03464e-08	CG43143	uncharacterized protein
676	FBgn0023508	2489.74	2.14414	0.360016	5.95567	2.59007e-09	2.05119e-08	Ocrl	Oculocerebrorenal syndrome of Lowe
677	FBgn0031981	545.105	3.07597	0.517611	5.94263	2.8048e-09	2.20542e-08	CG7466	CG7466
678	FBgn0032748	1345.82	2.19278	0.369368	5.93658	2.91034e-09	2.2724e-08	CG10492	uncharacterized protein
679	FBgn0086655	1003.26	2.20493	0.372146	5.92492	3.12449e-09	2.42227e-08	jing	jing
680	FBgn0261053	43.798	5.07649	0.857093	5.92292	3.1628e-09	2.44815e-08	Cad86C	Cadherin 86C
681	FBgn0003028	2661.74	2.10657	0.355675	5.92275	3.16604e-09	2.44875e-08	ovo	ovo
682	FBgn0011592	273.196	2.58552	0.43661	5.9218	3.18446e-09	2.46101e-08	fra	frazzled
683	FBgn0262582	2088.19	2.16035	0.364821	5.92167	3.18685e-09	2.46101e-08	cic	capicua
684	FBgn0027611	665.815	2.52138	0.425838	5.92098	3.2002e-09	2.4694e-08	LManII	Lysosomal alpha-mannosidase II
685	FBgn0038853	493.789	2.16429	0.36586	5.91561	3.30647e-09	2.54691e-08	RhoGAP93B	Rho GTPase activating protein at 93B
686	FBgn0003475	1276.03	2.26565	0.383168	5.91294	3.36058e-09	2.58112e-08	spir	spire
687	FBgn0263391	4762.66	2.33228	0.394832	5.90702	3.48348e-09	2.66726e-08	hts	hu li tai shao
688	FBgn0262127	641.476	2.70124	0.458437	5.89227	3.8093e-09	2.89443e-08	kibra	kibra
689	FBgn0024510	1337.82	2.00769	0.34079	5.89129	3.83191e-09	2.90938e-08	dlt	discs lost
690	FBgn0037963	958.201	2.19761	0.373572	5.8827	4.03635e-09	3.05992e-08	Cad87A	Cadherin 87A
691	FBgn0037703	214.072	2.0198	0.34343	5.88124	4.07198e-09	3.08458e-08	JHDM2	JmjC domain-containing histone demethylase 2
692	FBgn0003520	2664.07	2.0807	0.354165	5.87494	4.22986e-09	3.1993e-08	stau	staufen
693	FBgn0040372	4049.02	2.54529	0.433896	5.86613	4.46073e-09	3.35423e-08	G9a	G9a
694	FBgn0261934	1592.52	2.22524	0.379731	5.86004	4.62755e-09	3.46056e-08	dikar	dikar
695	FBgn0003396	524.526	2.84715	0.487131	5.84472	5.07428e-09	3.76065e-08	shn	schnurri
696	FBgn0041604	512.192	2.18035	0.373176	5.8427	5.13615e-09	3.798e-08	dlp	dally-like
697	FBgn0265140	1010.07	2.00641	0.343614	5.83914	5.24705e-09	3.87712e-08	Meltrin	meltrin
698	FBgn0001341	2143.41	2.14072	0.36701	5.83287	5.44829e-09	4.02282e-08	l(1)1Bi	lethal (1) 1Bi
699	FBgn0038816	958.832	3.10742	0.533039	5.82963	5.5549e-09	4.09241e-08	Lrrk	Leucine-rich repeat kinase
700	FBgn0003227	492.443	2.0685	0.354844	5.82934	5.56485e-09	4.0967e-08	rec	recombination-defective
701	FBgn0002878	2514.63	2.44686	0.419877	5.82755	5.62462e-09	4.13764e-08	mus101	mutagen-sensitive 101
702	FBgn0031170	343.962	2.61805	0.449984	5.8181	5.9519e-09	4.3494e-08	CG1718	CG1718
703	FBgn0011766	906.425	2.06343	0.355144	5.81011	6.24315e-09	4.53885e-08	E2f1	E2F transcription factor 1
704	FBgn0283503	869.422	2.58629	0.445272	5.80833	6.31002e-09	4.58411e-08	Neurl4	Neuralized E3 ubiquitin protein ligase 4
705	FBgn0013272	583.033	2.99744	0.516904	5.79883	6.67781e-09	4.83715e-08	Gp150	Gp150
706	FBgn0038324	222.486	2.44162	0.422912	5.77334	7.77157e-09	5.59272e-08	CG5038	CG5038
707	FBgn0003391	844.86	2.27104	0.39341	5.7727	7.8013e-09	5.61004e-08	shg	shotgun
708	FBgn0039590	327.536	3.20431	0.55603	5.76283	8.27133e-09	5.91379e-08	CG10011	uncharacterized protein
709	FBgn0052758	907.598	2.02455	0.351809	5.75468	8.68075e-09	6.17539e-08	CG32758	uncharacterized protein
710	FBgn0024944	109.853	4.42665	0.769572	5.75209	8.81455e-09	6.25266e-08	Oamb	Octopamine receptor in mushroom bodies
711	FBgn0003862	1151.95	2.71089	0.471568	5.74867	8.99459e-09	6.3622e-08	trx	trithorax
712	FBgn0038870	778.48	2.0598	0.358517	5.74533	9.17412e-09	6.47996e-08	Oga	O-GlcNAcase
713	FBgn0002872	1657.37	2.01096	0.350223	5.74195	9.35943e-09	6.60146e-08	mu2	mutator 2
714	FBgn0015277	1440.1	2.49952	0.435517	5.73921	9.51164e-09	6.6993e-08	Pi3K59F	Phosphotidylinositol 3 kinase 59F
715	FBgn0000709	2280.51	2.17497	0.378977	5.73905	9.5208e-09	6.701e-08	fliI	flightless I
716	FBgn0036340	2376.87	2.04025	0.355984	5.7313	9.96657e-09	6.98997e-08	SRm160	SRm160
717	FBgn0011739	713.234	2.54394	0.44412	5.72805	1.01594e-08	7.11014e-08	wts	warts
718	FBgn0261260	364.158	3.56156	0.622584	5.72062	1.06138e-08	7.41771e-08	mgl	Megalin
719	FBgn0045035	738.614	2.37924	0.41629	5.71535	1.09477e-08	7.64254e-08	tefu	telomere fusion
720	FBgn0040232	571.112	2.17341	0.380507	5.71188	1.11737e-08	7.78165e-08	cmet	CENP-meta
721	FBgn0264494	237.784	2.22454	0.3898	5.70689	1.15062e-08	8.00198e-08	CG17646	uncharacterized protein
722	FBgn0038721	508.697	2.54659	0.446251	5.70662	1.15239e-08	8.00864e-08	subdued	subdued
723	FBgn0283682	1884.96	2.18458	0.383573	5.69535	1.23119e-08	8.49092e-08	Ge-1	Ge-1
724	FBgn0041188	1312.57	2.14708	0.377594	5.68622	1.29885e-08	8.9204e-08	Atx2	Ataxin-2
725	FBgn0005536	754.477	2.15928	0.381119	5.66563	1.46489e-08	1.00123e-07	Mbs	Myosin binding subunit
726	FBgn0004655	4444.68	2.18217	0.3856	5.65915	1.52123e-08	1.03546e-07	wapl	wings apart-like
727	FBgn0034854	1062.69	2.21314	0.39242	5.63973	1.70318e-08	1.14673e-07	Golgin245	Golgin-245
728	FBgn0052264	593.488	2.23022	0.396209	5.6289	1.81362e-08	1.21287e-07	CG32264	uncharacterized protein
729	FBgn0030400	615.29	2.03837	0.362305	5.6261	1.84325e-08	1.23185e-07	CG11138	uncharacterized protein
730	FBgn0036448	799.034	2.06047	0.366306	5.625	1.85511e-08	1.23865e-07	mop	myopic
731	FBgn0013810	98.0714	2.34361	0.416762	5.62339	1.87248e-08	1.24802e-07	Dhc36C	Dynein heavy chain at 36C
732	FBgn0003016	625.232	2.30424	0.410541	5.61268	1.99215e-08	1.32246e-07	osp	outspread
733	FBgn0026369	2176.68	2.06718	0.369368	5.59653	2.18682e-08	1.44014e-07	Sara	Smad anchor for receptor activation
734	FBgn0283657	964.078	2.07133	0.37037	5.59259	2.23702e-08	1.4693e-07	Tlk	Tousled-like kinase
735	FBgn0029997	792.962	2.11367	0.378259	5.58787	2.29866e-08	1.50879e-07	CG2258	CG2258
736	FBgn0005624	683.529	2.26597	0.405782	5.5842	2.34773e-08	1.53896e-07	Psc	Posterior sex combs
737	FBgn0026206	825.165	2.42096	0.434785	5.56817	2.57426e-08	1.67529e-07	mei-P26	meiotic P26
738	FBgn0003268	2042.05	2.42488	0.436032	5.56125	2.67849e-08	1.73857e-07	rod	rough deal
739	FBgn0036837	1723.88	2.1394	0.385315	5.55235	2.81857e-08	1.82353e-07	CG18135	uncharacterized protein
740	FBgn0025800	994.229	2.19532	0.395781	5.54681	2.90934e-08	1.87737e-07	Smox	Smad on X
741	FBgn0034618	3531.23	2.97414	0.536912	5.53934	3.03612e-08	1.9541e-07	CG9485	CG9485
742	FBgn0027568	2802.47	2.46548	0.445167	5.53833	3.05374e-08	1.96417e-07	Cand1	Cullin-associated and neddylation-dissociated 1
743	FBgn0029895	65.3359	3.69173	0.667547	5.53029	3.19699e-08	2.05099e-07	CG14441	uncharacterized protein
744	FBgn0036714	268.651	2.81848	0.509882	5.5277	3.24452e-08	2.07879e-07	CG7692	CG7692
745	FBgn0259242	35.8204	4.04013	0.734145	5.50317	3.73015e-08	2.36855e-07	CG42340	uncharacterized protein
746	FBgn0034709	506.419	2.67463	0.486043	5.50286	3.73676e-08	2.37123e-07	Swim	Secreted Wg-interacting molecule
747	FBgn0029976	1356.12	2.20278	0.400484	5.50029	3.79166e-08	2.403e-07	snz	snazarus
748	FBgn0086690	659.648	2.28768	0.415972	5.4996	3.80656e-08	2.40937e-07	Plp	Pericentrin-like protein
749	FBgn0263316	33.5085	4.56097	0.829373	5.4993	3.81312e-08	2.41198e-07	Mrp4	Multidrug resistance protein 4
750	FBgn0015541	51.6079	4.03947	0.736145	5.48733	4.08056e-08	2.56644e-07	sda	slamdance
751	FBgn0010246	377.89	2.82964	0.51577	5.48625	4.10559e-08	2.58054e-07	Myo61F	Myosin 61F
752	FBgn0023143	11738.9	2.12044	0.387105	5.47768	4.30933e-08	2.69655e-07	Uba1	Ubiquitin activating enzyme 1
753	FBgn0264953	383.03	2.52392	0.460955	5.47541	4.36501e-08	2.72807e-07	Piezo	piezo
754	FBgn0026427	1206.34	2.08954	0.382045	5.46936	4.51674e-08	2.80776e-07	Su(var)2-HP2	Su(var)2-HP2
755	FBgn0052296	367.565	2.09406	0.382993	5.46761	4.56132e-08	2.83116e-07	Mrtf	Myocardin-related transcription factor
756	FBgn0031969	1413.6	2.01442	0.368846	5.46142	4.7234e-08	2.92627e-07	pes	peste
757	FBgn0038047	120.151	2.73956	0.505314	5.4215	5.91019e-08	3.6164e-07	CG5245	CG5245
758	FBgn0037363	791.692	2.39596	0.443652	5.40054	6.64415e-08	4.0406e-07	Atg17	Autophagy-related 17
759	FBgn0020762	155.461	2.93187	0.5432	5.39741	6.76089e-08	4.10406e-07	Atet	ABC transporter expressed in trachea
760	FBgn0020251	306.09	2.29149	0.424936	5.39256	6.94601e-08	4.20872e-07	sfl	sulfateless
761	FBgn0260745	896.519	2.96286	0.549478	5.39214	6.96224e-08	4.21598e-07	mfas	midline fasciclin
762	FBgn0043854	2164.58	2.01118	0.37383	5.37992	7.45172e-08	4.4796e-07	slam	slow as molasses
763	FBgn0001624	239.224	2.53131	0.470611	5.37876	7.49996e-08	4.50587e-07	dlg1	discs large 1
764	FBgn0264324	872.857	2.96924	0.553126	5.3681	7.95686e-08	4.76596e-07	spg	sponge
765	FBgn0001078	411.972	2.31671	0.432591	5.35543	8.53533e-08	5.0879e-07	ftz-f1	ftz transcription factor 1
766	FBgn0010194	281.457	2.28388	0.427093	5.34751	8.91707e-08	5.3059e-07	Wnt5	Wnt oncogene analog 5
767	FBgn0040233	1626.46	2.21367	0.414141	5.3452	9.03158e-08	5.37082e-07	cana	CENP-ana
768	FBgn0034570	476.729	2.11027	0.395792	5.33176	9.72641e-08	5.74994e-07	CG10543	uncharacterized protein
769	FBgn0033352	1364.23	2.09455	0.393457	5.32346	1.01812e-07	5.99702e-07	PAN2	Poly(A)-binding protein-dependent poly(A) ribonuclease 2
770	FBgn0250754	1402.57	2.27387	0.427221	5.32247	1.02366e-07	6.02604e-07	CG42232	uncharacterized protein
771	FBgn0034083	333.661	2.12239	0.399441	5.3134	1.07599e-07	6.3154e-07	lbk	lambik
772	FBgn0051163	711.047	2.24793	0.424423	5.29645	1.18078e-07	6.89784e-07	SKIP	Shal K[+] channel interacting protein
773	FBgn0261786	1734.57	2.07988	0.393132	5.29054	1.21958e-07	7.10359e-07	mi	minus
774	FBgn0052767	762.523	2.32018	0.439261	5.282	1.27778e-07	7.41216e-07	CG32767	uncharacterized protein
775	FBgn0261261	381.781	2.63524	0.500367	5.26661	1.38969e-07	8.02854e-07	plx	pollux
776	FBgn0022768	2009.19	2.33032	0.442735	5.26347	1.41363e-07	8.16208e-07	Pp2C1	Protein phosphatase 2C
777	FBgn0266916	955.255	2.117	0.402394	5.26101	1.43269e-07	8.25769e-07	Cenp-C	Centromeric protein-C
778	FBgn0015371	2323.51	2.0439	0.388596	5.25969	1.44302e-07	8.3124e-07	chn	charlatan
779	FBgn0026375	1085.65	2.20075	0.42029	5.23625	1.63869e-07	9.34201e-07	RhoGAPp190	Rho GTPase activating protein p190
780	FBgn0051158	802.004	2.61481	0.499777	5.23196	1.67725e-07	9.52906e-07	Efa6	Exchange factor for Arf 6
781	FBgn0000180	40.091	4.67335	0.896526	5.21273	1.86081e-07	1.05178e-06	bib	big brain
782	FBgn0030344	1023.82	2.0183	0.387448	5.20923	1.8963e-07	1.06926e-06	CG2025	CG2025
783	FBgn0262740	845.596	2.05629	0.395109	5.20435	1.94682e-07	1.09046e-06	Evi5	Ecotropic viral integration site 5
784	FBgn0036571	429.596	2.25172	0.432744	5.20337	1.9571e-07	1.09499e-06	Strumpellin	strumpellin
785	FBgn0016754	346.645	2.35344	0.452869	5.19673	2.0282e-07	1.13285e-06	sba	six-banded
786	FBgn0261698	888.513	2.17763	0.419085	5.19616	2.03445e-07	1.1357e-06	SLO2	slowpoke 2
787	FBgn0034072	406.169	2.16502	0.416921	5.19288	2.07064e-07	1.1546e-06	Dg	Dystroglycan
788	FBgn0032817	1151.19	2.46629	0.47611	5.18008	2.2179e-07	1.23326e-06	CG10631	uncharacterized protein
789	FBgn0266756	529.029	3.46611	0.669863	5.17436	2.28694e-07	1.27022e-06	btsz	bitesize
790	FBgn0015577	81.2449	4.56129	0.882435	5.16898	2.35372e-07	1.30512e-06	alpha-Est9	alpha-Esterase-9
791	FBgn0019990	1630.71	2.87341	0.558062	5.1489	2.62018e-07	1.43842e-06	Gcn2	Gcn2
792	FBgn0032120	1123.34	2.42819	0.471592	5.14892	2.61987e-07	1.43842e-06	CG33298	uncharacterized protein
793	FBgn0020412	1251.76	2.0761	0.405056	5.12545	2.96826e-07	1.61877e-06	JIL-1	JIL-1 kinase
794	FBgn0003963	333.871	2.86	0.558345	5.12229	3.01853e-07	1.64264e-06	ush	u-shaped
795	FBgn0003159	1904.22	2.05316	0.401511	5.11359	3.16101e-07	1.71729e-06	CG2841	CG2841
796	FBgn0260938	1279.13	2.29895	0.449993	5.10885	3.24118e-07	1.75988e-06	tay	tay bridge
797	FBgn0050418	47.5143	4.05092	0.793138	5.10746	3.2652e-07	1.77098e-06	nord	nord
798	FBgn0038652	114.206	2.58367	0.507488	5.0911	3.55995e-07	1.91724e-06	CG7720	CG7720
799	FBgn0034797	174.376	3.40823	0.669653	5.08954	3.58926e-07	1.93093e-06	nahoda	nahoda
800	FBgn0000464	88.9903	2.97178	0.583928	5.08929	3.59401e-07	1.93244e-06	Lar	Leukocyte-antigen-related-like
801	FBgn0004390	604.155	2.21681	0.435708	5.08783	3.6218e-07	1.94527e-06	RasGAP1	Ras GTPase activating protein 1
802	FBgn0261986	237.147	2.0988	0.412534	5.08758	3.62665e-07	1.94683e-06	RASSF8	Ras association domain family member 8
803	FBgn0030600	84.2589	3.86056	0.759126	5.08553	3.66604e-07	1.96203e-06	hiw	highwire
804	FBgn0283741	214.104	2.43614	0.482534	5.04864	4.44957e-07	2.34174e-06	prage	prage
805	FBgn0015269	470.14	3.20935	0.636227	5.04435	4.55067e-07	2.38862e-06	Nf1	Neurofibromin 1
806	FBgn0051635	724.551	2.08983	0.415092	5.03462	4.78796e-07	2.50655e-06	CG31635	uncharacterized protein
807	FBgn0036043	1129.88	2.21072	0.439511	5.02996	4.90593e-07	2.5629e-06	CG8177	CG8177
808	FBgn0038532	288.728	2.01174	0.400184	5.02704	4.98105e-07	2.59941e-06	CG14322	uncharacterized protein
809	FBgn0030960	165.734	2.12887	0.423782	5.0235	5.07388e-07	2.6423e-06	Atg101	Autophagy-related 101
810	FBgn0002643	202.302	2.5999	0.517955	5.01955	5.17938e-07	2.69301e-06	mam	mastermind
811	FBgn0035923	506.123	2.45695	0.491146	5.00248	5.6596e-07	2.91825e-06	CG6511	CG6511
812	FBgn0260634	778.538	2.13733	0.427868	4.9953	5.87437e-07	3.01802e-06	eIF4G2	eukaryotic translation initiation factor 4G2
813	FBgn0005616	162.99	2.79718	0.563555	4.96346	6.9248e-07	3.52487e-06	msl-2	male-specific lethal 2
814	FBgn0024150	19.8402	4.58035	0.923524	4.95965	7.06219e-07	3.59206e-06	Ac78C	Adenylyl cyclase 78C
815	FBgn0034240	1540.6	2.17948	0.44035	4.94944	7.44265e-07	3.75956e-06	MESR4	Misexpression suppressor of ras 4
816	FBgn0000719	475.272	2.23047	0.451973	4.93498	8.01601e-07	4.02666e-06	fog	folded gastrulation
817	FBgn0022710	160.383	3.0012	0.609682	4.92257	8.54146e-07	4.25829e-06	Ac13E	Adenylyl cyclase 35C
818	FBgn0039431	105.816	2.89166	0.587538	4.92166	8.58127e-07	4.276e-06	plum	plum
819	FBgn0259227	529.649	2.12375	0.432089	4.91508	8.8748e-07	4.4134e-06	CG42327	uncharacterized protein
820	FBgn0024555	2030.78	2.15108	0.438736	4.9029	9.44335e-07	4.67041e-06	flfl	falafel
821	FBgn0020503	742.66	2.66787	0.544657	4.89825	9.66957e-07	4.77992e-06	CLIP-190	Cytoplasmic linker protein 190
822	FBgn0000307	1155.1	2.07554	0.424103	4.89396	9.8826e-07	4.87309e-06	chif	chiffon
823	FBgn0264502	42.9462	4.61939	0.949136	4.86694	1.13341e-06	5.55023e-06	CG43901	uncharacterized protein
824	FBgn0260941	350.201	2.14356	0.440656	4.86447	1.14767e-06	5.61452e-06	app	approximated
825	FBgn0023518	509.412	2.32461	0.479058	4.85246	1.21939e-06	5.95073e-06	trr	trithorax-related
826	FBgn0261800	282.693	3.20937	0.661479	4.8518	1.22345e-06	5.9676e-06	LanB1	LanB1
827	FBgn0036463	18.6269	4.48347	0.92863	4.82805	1.3788e-06	6.66319e-06	Reck	Reversion-inducing-cysteine-rich protein with kazal motifs
828	FBgn0039004	2516.86	2.23547	0.464369	4.81399	1.47943e-06	7.0977e-06	Nup133	Nucleoporin 133kD
829	FBgn0003174	247.461	3.78262	0.786147	4.8116	1.4973e-06	7.17456e-06	pwn	pawn
830	FBgn0052000	814.092	2.17817	0.453318	4.80495	1.54791e-06	7.39763e-06	CG32000	uncharacterized protein
831	FBgn0033661	3505.29	2.46738	0.51378	4.80242	1.56761e-06	7.48097e-06	CG13185	uncharacterized protein
832	FBgn0267348	219.655	3.04509	0.634627	4.79824	1.60069e-06	7.62788e-06	LanB2	Laminin B2
833	FBgn0052702	290.15	2.07279	0.432043	4.79765	1.60536e-06	7.64275e-06	Cubn	Cubilin
834	FBgn0015024	959.242	2.01191	0.421084	4.77793	1.77107e-06	8.36354e-06	CkIalpha	Casein kinase Ialpha
835	FBgn0035357	154.479	2.03391	0.426052	4.77385	1.8074e-06	8.52291e-06	MEP-1	MEP-1
836	FBgn0263974	608.244	2.80524	0.588625	4.76574	1.88161e-06	8.83512e-06	qin	qin
837	FBgn0052666	992.547	2.17986	0.457824	4.76134	1.92313e-06	9.00875e-06	Drak	Death-associated protein kinase related
838	FBgn0086613	1272.27	2.23488	0.469714	4.75795	1.95564e-06	9.14814e-06	Ino80	INO80 complex subunit
839	FBgn0263600	2767.98	2.19434	0.461744	4.75228	2.01135e-06	9.39104e-06	DNApol-delta	DNA-polymerase-delta
840	FBgn0036896	388.814	2.34577	0.495054	4.73842	2.15392e-06	1.00049e-05	wnd	wallenda
841	FBgn0263873	39.176	3.79731	0.803391	4.7266	2.28311e-06	1.05312e-05	sick	sickie
842	FBgn0013813	43.4738	4.09191	0.867011	4.71956	2.36357e-06	1.0882e-05	Dhc98D	Dynein heavy chain at 89D
843	FBgn0050463	924.97	2.14481	0.455606	4.7076	2.50648e-06	1.14762e-05	CG30463	uncharacterized protein
844	FBgn0029095	802.941	2.01517	0.429239	4.69474	2.66943e-06	1.21606e-05	aru	arouser
845	FBgn0032587	425.431	2.34152	0.499265	4.68994	2.73282e-06	1.23982e-05	CG5953	CG5953
846	FBgn0034795	322.301	2.59006	0.555309	4.66417	3.09867e-06	1.39181e-05	MED23	Mediator complex subunit 23
847	FBgn0003861	27.0985	4.21454	0.905784	4.65292	3.27271e-06	1.4627e-05	trp	transient receptor potential
848	FBgn0029137	245.243	2.40509	0.516985	4.65216	3.28479e-06	1.46584e-05	Patsas	patsas
849	FBgn0032467	2235.03	2.01642	0.43381	4.64817	3.34892e-06	1.49139e-05	CG9934	CG9934
850	FBgn0027570	360.956	3.10583	0.668876	4.64336	3.42795e-06	1.52318e-05	Nep2	Neprilysin 2
851	FBgn0052137	144.716	2.83781	0.612572	4.63262	3.61064e-06	1.59721e-05	CG32137	uncharacterized protein
852	FBgn0050440	90.8516	2.70722	0.584597	4.63092	3.64049e-06	1.60683e-05	CG30440	uncharacterized protein
853	FBgn0025741	1064.67	2.23254	0.482092	4.63093	3.64025e-06	1.60683e-05	PlexA	Plexin A
854	FBgn0039680	2296.67	2.20954	0.477149	4.63071	3.64407e-06	1.6077e-05	Cap-D2	CAP-D2 condensin subunit
855	FBgn0284221	215.575	2.67535	0.578734	4.62276	3.78666e-06	1.66764e-05	Sema5c	Semaphorin 5c
856	FBgn0032167	47.3405	3.39091	0.734003	4.61974	3.84217e-06	1.68984e-05	CG5853	CG5853
857	FBgn0003328	65.8568	3.5158	0.769153	4.57099	4.85419e-06	2.10144e-05	scb	scab
858	FBgn0000542	113.678	3.47565	0.761481	4.56433	5.01101e-06	2.16179e-05	ec	echinus
859	FBgn0002938	18.5707	4.29087	0.943694	4.54688	5.44461e-06	2.33062e-05	ninaC	neither inactivation nor afterpotential C
860	FBgn0035617	611.155	2.00286	0.444214	4.50876	6.52073e-06	2.7428e-05	l(3)psg2	lethal (3) persistent salivary gland 2
861	FBgn0261563	19.9598	4.27163	0.947755	4.5071	6.57188e-06	2.76314e-05	wb	wing blister
862	FBgn0013953	236.343	3.14377	0.698905	4.49814	6.85518e-06	2.86045e-05	Esp	Epidermal stripes and patches
863	FBgn0026376	391.246	2.19309	0.487616	4.49758	6.87305e-06	2.8667e-05	Rgl	Ral guanine nucleotide dissociation stimulator-like
864	FBgn0003053	174.457	2.91575	0.649419	4.48978	7.1296e-06	2.96251e-05	peb	pebbled
865	FBgn0027509	1663.02	2.13706	0.479957	4.4526	8.48354e-06	3.47997e-05	TBCD	tubulin folding cofactor D
866	FBgn0267001	42.3408	3.63709	0.818621	4.44295	8.87351e-06	3.62496e-05	Ten-a	Tenascin accessory
867	FBgn0259938	373.405	2.40479	0.541611	4.44007	8.99294e-06	3.66772e-05	cwo	clockwork orange
868	FBgn0037811	54.6294	2.89452	0.652796	4.43404	9.24838e-06	3.75954e-05	CG12592	uncharacterized protein
869	FBgn0036814	248.489	2.73576	0.618774	4.42126	9.81262e-06	3.97427e-05	CG14073	uncharacterized protein
870	FBgn0038290	40.7184	2.66287	0.604264	4.4068	1.04907e-05	4.22822e-05	CG6912	CG6912
871	FBgn0051038	96.8174	2.76432	0.627757	4.40349	1.06526e-05	4.28997e-05	CG31038	uncharacterized protein
872	FBgn0053554	432.179	2.10432	0.479897	4.38494	1.16015e-05	4.64575e-05	Nipped-A	Nipped-A
873	FBgn0265991	414.401	2.71654	0.620967	4.37469	1.21605e-05	4.84807e-05	Zasp52	Z band alternatively spliced PDZ-motif protein 52
874	FBgn0038439	15.7505	4.13659	0.948651	4.3605	1.29767e-05	5.15075e-05	Cad89D	Cadherin 89D
875	FBgn0034903	69.247	3.89064	0.894596	4.34905	1.36728e-05	5.40115e-05	CG9850	CG9850
876	FBgn0030576	18.1731	4.12377	0.954567	4.32004	1.56e-05	6.09696e-05	CG15890	uncharacterized protein
877	FBgn0260748	1093.42	2.12983	0.496024	4.29381	1.75636e-05	6.7843e-05	CG5004	CG5004
878	FBgn0032218	25.0868	3.61232	0.841566	4.29238	1.76765e-05	6.82261e-05	CG5381	CG5381
879	FBgn0034644	232.199	2.05835	0.479573	4.29205	1.77032e-05	6.82758e-05	CG10082	uncharacterized protein
880	FBgn0020622	781.379	2.22378	0.51887	4.2858	1.82081e-05	7.00326e-05	Pi3K21B	Pi3K21B
881	FBgn0012051	505.448	2.0293	0.473711	4.28383	1.83706e-05	7.05486e-05	CalpA	Calpain-A
882	FBgn0035142	1153.29	2.03002	0.475071	4.27309	1.92783e-05	7.37208e-05	Hipk	Homeodomain interacting protein kinase
883	FBgn0030615	137.332	2.71334	0.636425	4.2634	2.01338e-05	7.67853e-05	Cyp4s3	Cyp4s3
884	FBgn0052113	323.035	2.9936	0.704051	4.25196	2.11911e-05	8.02628e-05	CG32113	uncharacterized protein
885	FBgn0085408	176.506	3.19987	0.756855	4.22785	2.3594e-05	8.83862e-05	Shroom	shroom
886	FBgn0262562	71.9186	3.00573	0.712986	4.21569	2.49017e-05	9.29345e-05	CG43102	uncharacterized protein
887	FBgn0010435	301.39	2.83276	0.674363	4.20065	2.66148e-05	9.89189e-05	emp	epithelial membrane protein
888	FBgn0029881	114.151	2.16615	0.515708	4.20033	2.66525e-05	9.9022e-05	pigs	pickled eggs
889	FBgn0003710	15.9602	3.79714	0.90525	4.19457	2.73384e-05	0.000101267	tipE	temperature-induced paralytic E
890	FBgn0005612	227.872	2.08529	0.498987	4.17905	2.92734e-05	0.000107752	Sox14	Sox box protein 14
891	FBgn0041180	193.177	2.28595	0.547211	4.17746	2.94786e-05	0.000108266	Tep4	Thioester-containing protein 4
892	FBgn0035264	72.9327	3.34814	0.802732	4.17093	3.03358e-05	0.000111004	Oseg4	Outer segment 4
893	FBgn0023001	33.1735	3.19433	0.771436	4.14075	3.4617e-05	0.000125422	melt	melted
894	FBgn0260933	85.8541	3.14629	0.76063	4.13643	3.52749e-05	0.000127666	rempA	reduced mechanoreceptor potential A
895	FBgn0029830	190.698	2.36641	0.572493	4.13352	3.57256e-05	0.000129203	Grip	Glutamate receptor binding protein
896	FBgn0004364	321.536	3.10664	0.754146	4.11941	3.79841e-05	0.000136823	18w	18 wheeler
897	FBgn0283451	216.091	2.7827	0.676474	4.11353	3.89649e-05	0.000140203	br	broad
898	FBgn0039872	59.812	2.69676	0.657	4.10466	4.04917e-05	0.000145223	salt	salty dog
899	FBgn0010651	91.6769	2.73725	0.669704	4.08725	4.3652e-05	0.000155602	MFS14	Major Facilitator Superfamily Transporter 14
900	FBgn0004885	25.9981	3.82237	0.941806	4.05855	4.93789e-05	0.000174637	tok	tolkin
901	FBgn0016974	163.341	2.14733	0.530791	4.04554	5.22037e-05	0.000183712	swaPsi	swallow pseudogene
902	FBgn0262160	115.652	2.87888	0.711871	4.04411	5.25217e-05	0.000184635	CG9932	CG9932
903	FBgn0030596	715.087	2.19351	0.543921	4.03277	5.51233e-05	0.000192961	CG12398	uncharacterized protein
904	FBgn0050047	13.1668	3.87381	0.960689	4.03232	5.52285e-05	0.000193261	CG30047	uncharacterized protein
905	FBgn0014073	58.8967	3.67808	0.912821	4.02935	5.59312e-05	0.000195513	Tie	Tie-like receptor tyrosine kinase
906	FBgn0003507	266.583	2.54944	0.63624	4.00705	6.14825e-05	0.000213565	srp	serpent
907	FBgn0035880	160.304	2.19282	0.548155	4.00037	6.32434e-05	0.000219298	Culd	CUB and LDLa domain
908	FBgn0004583	113.78	2.83746	0.711438	3.98834	6.65367e-05	0.000229886	ex	expanded
909	FBgn0035308	81.7159	2.74157	0.69029	3.97162	7.13846e-05	0.000245047	CG15822	uncharacterized protein
910	FBgn0250850	2830.12	2.05863	0.518617	3.96946	7.20359e-05	0.000247026	rig	rigor mortis
911	FBgn0032330	218.634	2.16137	0.545101	3.96508	7.33716e-05	0.000251346	Samuel	SAM-motif ubiquitously expressed punctatedly localized protein
912	FBgn0000299	1865.5	3.18924	0.806227	3.95576	7.62929e-05	0.000260635	Col4a1	Collagen type IV alpha 1
913	FBgn0041723	42.9663	3.50518	0.887844	3.94796	7.88183e-05	0.000268155	rho-5	rhomboid-5
914	FBgn0283499	174.716	2.67578	0.680755	3.9306	8.47325e-05	0.000286607	InR	Insulin-like receptor
915	FBgn0002926	540.821	2.42585	0.618786	3.92034	8.84225e-05	0.000298073	ndl	nudel
916	FBgn0004959	135.484	2.04226	0.523403	3.90189	9.54461e-05	0.000320336	phm	phantom
917	FBgn0000964	243.548	2.56773	0.66024	3.88908	0.000100625	0.000335901	tj	traffic jam
918	FBgn0259140	13.5855	3.76378	0.96846	3.88636	0.000101761	0.00033935	CG42255	uncharacterized protein
919	FBgn0004893	21.7106	3.5303	0.909935	3.87973	0.000104573	0.000348261	bowl	brother of odd with entrails limited
920	FBgn0000120	212.83	2.00995	0.519117	3.87187	0.000108003	0.000358363	Arr1	Arrestin 1
921	FBgn0060296	110.041	2.5357	0.655686	3.86724	0.000110074	0.00036414	pain	painless
922	FBgn0034718	435.915	2.45822	0.637167	3.85805	0.000114294	0.00037722	wdp	windpipe
923	FBgn0039873	84.9095	2.49513	0.651412	3.83034	0.000127965	0.000418307	Smvt	Sodium-dependent multivitamin transporter
924	FBgn0036576	53.6327	2.62875	0.68782	3.82186	0.00013245	0.000431408	CG5151	CG5151
925	FBgn0263930	69.4841	2.97698	0.779351	3.81982	0.00013355	0.000434704	dally	division abnormally delayed
926	FBgn0020294	13.2563	3.70147	0.97139	3.81049	0.000138694	0.00044968	ko	knockout
927	FBgn0039776	379.301	2.47261	0.650336	3.80206	0.000143498	0.00046344	PH4alphaEFB	prolyl-4-hydroxylase-alpha EFB
928	FBgn0262656	137.235	2.4799	0.65391	3.79242	0.000149183	0.000480085	Myc	Myc
929	FBgn0005631	24.9138	3.24248	0.859351	3.77317	0.000161187	0.000515208	robo1	roundabout 1
930	FBgn0025702	13.2194	3.47982	0.926128	3.75738	0.000171699	0.00054547	Srpk79D	Serine-arginine protein kinase at 79D
931	FBgn0031805	65.5481	2.53946	0.676189	3.75555	0.000172958	0.000548945	CG9505	CG9505
932	FBgn0039594	68.2463	2.59977	0.69406	3.74574	0.000179862	0.000569402	CG9990	CG9990
933	FBgn0250907	55.0752	2.17163	0.580399	3.74161	0.000182845	0.000577554	Cht10	Chitinase 10
934	FBgn0264975	224.453	2.21532	0.592598	3.73831	0.00018526	0.000584439	Nrg	Neuroglian
935	FBgn0037751	11.6141	3.62562	0.972391	3.72856	0.000192575	0.000605594	topi	matotopetli
936	FBgn0028371	241.796	2.16697	0.581966	3.72353	0.000196458	0.000617218	jbug	jitterbug
937	FBgn0037405	1417.17	3.21056	0.863514	3.71802	0.000200793	0.000630637	CG1077	CG1077
938	FBgn0038469	3045.69	3.1031	0.838853	3.69922	0.000216264	0.000673054	CG4009	CG4009
939	FBgn0038237	21.5042	3.25269	0.88164	3.68936	0.000224816	0.00069792	Pde6	Phosphodiesterase 6
940	FBgn0024179	51.4105	2.96136	0.806232	3.67308	0.00023964	0.000738631	wit	wishful thinking
941	FBgn0036273	345.178	2.07251	0.564394	3.67209	0.000240571	0.000741268	INPP5E	Inositol polyphosphate 5-phosphatase E
942	FBgn0037304	10.9034	3.55145	0.975006	3.64249	0.000270016	0.000826868	CG1113	CG1113
943	FBgn0039709	268.091	2.46608	0.677122	3.642	0.000270524	0.000827912	Cad99C	Cadherin 99C
944	FBgn0010383	400.111	2.06679	0.56797	3.6389	0.000273802	0.000836656	Cyp18a1	Cytochrome P450-18a1
945	FBgn0038247	32.0594	3.4072	0.936348	3.63882	0.000273893	0.000836677	Cad88C	Cadherin 88C
946	FBgn0262139	12.4285	3.54596	0.978169	3.6251	0.000288848	0.000877232	trh	trachealess
947	FBgn0039048	17.4941	3.1769	0.879323	3.61289	0.000302801	0.000915409	CG17111	uncharacterized protein
948	FBgn0004861	104.792	2.59827	0.719518	3.61113	0.00030487	0.000921103	ph-p	polyhomeotic proximal
949	FBgn0003731	195.936	2.57052	0.712734	3.60656	0.00031028	0.000934888	Egfr	Epidermal growth factor receptor
950	FBgn0011286	12.0352	3.52736	0.978436	3.6051	0.000312038	0.000939615	RyR	Ryanodine receptor
951	FBgn0015336	10.9724	3.51607	0.977048	3.59867	0.000319849	0.000959643	CG15865	uncharacterized protein
952	FBgn0010452	14.4973	3.5209	0.982098	3.58508	0.00033697	0.00100706	trn	tartan
953	FBgn0003089	55.6288	2.74085	0.765661	3.57971	0.000343975	0.00102614	pip	pipe
954	FBgn0029911	135.391	2.22054	0.621258	3.57426	0.000351225	0.00104714	CG14435	uncharacterized protein
955	FBgn0264542	55.357	2.31914	0.649368	3.57138	0.000355107	0.00105808	CG43921	uncharacterized protein
956	FBgn0034720	53.4228	2.0789	0.583457	3.56307	0.000366549	0.00109053	Liprin-gamma	Liprin-gamma
957	FBgn0260660	10.9694	3.34287	0.947598	3.52773	0.000419142	0.0012337	Mp	Multiplexin
958	FBgn0000635	66.2518	2.55613	0.726318	3.5193	0.000432686	0.0012713	Fas2	Fasciclin 2
959	FBgn0050438	48.2019	2.34886	0.668526	3.51349	0.000442267	0.00129715	CG30438	uncharacterized protein
960	FBgn0000274	58.8824	2.99554	0.856337	3.49808	0.000468619	0.00136878	Pka-C2	Protein kinase, cAMP-dependent, catalytic subunit 2
961	FBgn0263397	50.1255	2.7221	0.780726	3.48662	0.000489166	0.00142252	Ih	I[[h]] channel
962	FBgn0016797	58.402	2.61484	0.751266	3.48057	0.000500345	0.00145205	fz2	frizzled 2
963	FBgn0052532	11.7459	3.2658	0.94044	3.47263	0.000515392	0.00149267	CG32532	uncharacterized protein
964	FBgn0039530	70.7749	2.96406	0.855941	3.46292	0.000534341	0.00154081	Tusp	tusp
965	FBgn0032264	111.048	2.16415	0.625812	3.45815	0.000543908	0.00156521	Lip4	Lipase 4
966	FBgn0033443	98.2073	2.70468	0.784767	3.44648	0.000567944	0.0016259	CG1698	CG1698
967	FBgn0016080	42.9719	2.91105	0.84556	3.44275	0.000575831	0.00164611	xmas-1	xmas-1
968	FBgn0037206	10.4674	3.27202	0.951631	3.43833	0.000585317	0.0016685	CG12768	uncharacterized protein
969	FBgn0041092	132.315	2.32293	0.676085	3.43586	0.000590682	0.00168034	tai	taiman
970	FBgn0263973	22.4267	3.0668	0.894575	3.42822	0.000607551	0.00172339	jv	javelin
971	FBgn0003162	70.5408	2.01209	0.587835	3.42289	0.000619603	0.00175507	Pu	Punch
972	FBgn0261836	493.598	2.09224	0.614852	3.40284	0.000666884	0.00187562	Msp300	Muscle-specific protein 300 kDa
973	FBgn0030065	281.2	2.0996	0.618573	3.39427	0.000688119	0.00193043	CG12075	uncharacterized protein
974	FBgn0260386	9.88384	3.33307	0.983938	3.38747	0.000705392	0.0019722	mtg	mind the gap
975	FBgn0039862	68.7943	2.21455	0.654109	3.38559	0.000710251	0.00198467	kek6	kek6
976	FBgn0030156	9.7081	3.32943	0.983778	3.38433	0.000713534	0.00199216	CG15247	uncharacterized protein
977	FBgn0250871	21.3459	2.91017	0.866008	3.36044	0.00077817	0.00215746	pot	papillote
978	FBgn0029114	57.0721	2.66784	0.794518	3.35781	0.000785623	0.00217508	Tollo	tollo
979	FBgn0032082	203.181	2.55124	0.761308	3.35113	0.000804827	0.00222206	CG18088	uncharacterized protein
980	FBgn0013469	33.1684	2.71794	0.811474	3.34939	0.00080991	0.00223547	klu	klumpfuss
981	FBgn0037130	10.2144	3.29961	0.985943	3.34665	0.000817933	0.00225573	Syn1	Syntrophin-like 1
982	FBgn0031762	61.2686	2.4108	0.725335	3.3237	0.000888325	0.00243029	CG9098	CG9098
983	FBgn0027596	196.935	2.48089	0.746609	3.32288	0.000890927	0.00243674	Kank	kank
984	FBgn0038611	1674.81	2.75809	0.832696	3.31225	0.000925494	0.00252433	CG14309	uncharacterized protein
985	FBgn0029697	3929.56	3.05478	0.924499	3.30426	0.000952282	0.00259454	CG15570	uncharacterized protein
986	FBgn0031571	37.3123	2.65947	0.809259	3.2863	0.00101512	0.00274917	bark	bark beetle
987	FBgn0050015	80.2347	2.90446	0.887664	3.27203	0.00106779	0.00287144	CG30015	uncharacterized protein
988	FBgn0085376	186.117	2.49039	0.762082	3.26788	0.00108356	0.0029107	CG34347	uncharacterized protein
989	FBgn0052354	11.1893	3.11044	0.953096	3.26351	0.00110042	0.00295279	CG32354	uncharacterized protein
990	FBgn0034417	142.2	2.41894	0.74263	3.25726	0.00112495	0.00301028	CG15117	uncharacterized protein
991	FBgn0011746	85.8513	2.07736	0.639964	3.24606	0.00117016	0.00312053	ana	anachronism
992	FBgn0032068	180.23	2.25248	0.6981	3.22659	0.00125273	0.0033158	LManV	Lysosomal alpha-mannosidase V
993	FBgn0015380	11.9657	3.18056	0.992228	3.20548	0.00134838	0.00353972	drl	derailed
994	FBgn0051121	83.2353	2.52399	0.78807	3.20275	0.00136123	0.00356967	CG31121	uncharacterized protein
995	FBgn0085428	259.961	2.24927	0.704282	3.1937	0.0014046	0.00367372	Nox	NADPH oxidase
996	FBgn0085450	33.8212	2.3474	0.735873	3.18995	0.00142296	0.00371782	Snoo	Sno oncogene
997	FBgn0038881	32.2425	2.69638	0.847132	3.18295	0.00145783	0.00380291	CG16791	uncharacterized protein
998	FBgn0032116	12.6843	3.05537	0.980061	3.11753	0.00182373	0.00466551	Mco1	Multicopper oxidase-1
999	FBgn0031837	31.3319	2.40923	0.773099	3.11633	0.0018312	0.00468009	DIP-iota	Dpr-interacting protein iota
1000	FBgn0038136	59.1904	2.15978	0.698904	3.09024	0.00199995	0.00507189	CG8774	CG8774
1001	FBgn0036602	8.58053	3.06451	0.99243	3.08789	0.00201583	0.00510693	CG13042	uncharacterized protein
1002	FBgn0038385	26.3329	2.63092	0.857282	3.06892	0.00214837	0.00542026	Fbxl7	F-box and leucine-rich repeat protein 7
1003	FBgn0029172	74.4305	2.76081	0.902931	3.05761	0.00223109	0.00560085	Fad2	Fad2
1004	FBgn0010434	120.923	2.14408	0.706519	3.03471	0.00240769	0.00600772	cora	coracle
1005	FBgn0039783	9.91394	3.007	0.995454	3.02073	0.00252168	0.00625915	PH4alphaNE2	prolyl-4-hydroxylase-alpha NE2
1006	FBgn0033033	24.0949	2.89373	0.958976	3.01752	0.00254849	0.0063241	scaf	scarface
1007	FBgn0039774	14.7521	2.7807	0.930382	2.98877	0.00280104	0.00687862	CDase	Ceramidase
1008	FBgn0031975	80.9283	2.58126	0.866566	2.97872	0.00289452	0.0070819	Tg	Transglutaminase
1009	FBgn0261675	7.78592	2.95572	0.994779	2.97123	0.00296607	0.00722493	Npc1b	Niemann-Pick type C-1b
1010	FBgn0063649	11.6244	2.95016	0.997678	2.95703	0.00310619	0.00752457	CG6006	CG6006
1011	FBgn0035710	14.0937	2.66034	0.908913	2.92695	0.00342307	0.00822714	SP1173	SP1173
1012	FBgn0039419	17.6061	2.72864	0.932988	2.92462	0.00344873	0.00828079	CG12290	uncharacterized protein
1013	FBgn0037934	14.8952	2.33176	0.797406	2.92418	0.00345367	0.00829065	CG6830	CG6830
1014	FBgn0003486	89.7118	2.36095	0.810361	2.91346	0.00357452	0.00854151	spo	spook
1015	FBgn0051619	26.1835	2.66553	0.919809	2.89792	0.00375647	0.00892476	nolo	no long nerve cord
1016	FBgn0039075	7.90532	2.88761	0.996683	2.89722	0.00376487	0.00894019	CG4393	CG4393
1017	FBgn0260005	60.8114	2.04775	0.718731	2.84911	0.00438411	0.0102492	wtrw	water witch
